1 **Title: Weak Coupling Between Spontaneous Local Cortical Activity State Switches Under**  
2 **Anesthesia Leads to Strongly Correlated Global Cortical States.**

3 **Authors:** Ethan B. Blackwood<sup>\*,1</sup>, Brenna P. Shortal<sup>\*,1</sup>, Alex Proekt<sup>2,\$</sup>

4

5 \* Contributed equally to this manuscript

6 \$ Corresponding author. Address correspondence to [proekt@gmail.com](mailto:proekt@gmail.com)

7

8

9 **Affiliations:**

10 1. Department of Neuroscience, Perelman School of Medicine, University of Pennsylvania

11 2. Department of Anesthesia and Critical Care, Perelman School of Medicine, University of

12 Pennsylvania

13

14 **Abstract:**

15 Under anesthesia, neural dynamics deviate dramatically from those seen during wakefulness.  
16 During recovery from this perturbation, thalamocortical activity abruptly switches among a small  
17 set of metastable intermediate states. These metastable states and structured transitions among  
18 them form a scaffold that guides the brain back to the waking state. Here, we investigate the  
19 mechanisms that constrain cortical activity to discrete states and give rise to abrupt transitions  
20 among them. If state transitions were imposed onto the thalamocortical system by changes in the  
21 subcortical modulation, different cortical sites should exhibit near-synchronous state transitions.  
22 To test this hypothesis, we quantified state synchrony at different cortical sites in anesthetized  
23 rats. States were defined by compressing spectra of layer-specific local field potentials (LFPs) in  
24 visual and motor cortices. Transition synchrony, mutual information, and canonical correlations  
25 all demonstrate that most state transitions in the cortex are local and that coupling between sites  
26 is weak. Fluctuations in the LFP in the thalamic input layer 4 were particularly dissimilar from  
27 those in supra- and infra-granular layers. Thus, our results suggest that the discrete global cortical  
28 states are not imposed by the ascending modulatory pathways but emerge from the multitude of  
29 weak pairwise interactions within the cortex.

30

31 **Introduction:**

32 Brain activity arises as a result of interactions amongst billions of neurons and synapses. Each  
33 component in this vast network exhibits complex nonlinear dynamics (Hodgkin and Huxley, 1952;  
34 Pan and Zucker, 2009). Generically, such complex nonlinear dynamical systems can dramatically  
35 change their collective behavior after small changes in parameters or perturbations to their  
36 ongoing activity (Canavier et al., 1993; Destexhe et al., 1994; Ermentrout, 1998; Izhikevich, 2007;  
37 Strogatz, 2015). Furthermore, because nonlinear systems generally have multiple steady state  
38 behaviors, there is no guarantee that after a dramatic perturbation, the system will recover to its  
39 previous state once the perturbation subsides.

40

41 These considerations suggest that brain activity ought to be quite fragile and unable to withstand  
42 dramatic perturbations. Contrary to this intuition, there is ample evidence that the brain is  
43 remarkably robust to perturbations. Seizures, for instance, are a paradigmatic example of  
44 aberrant brain activity, being characterized by extreme synchronization in neuronal firing and  
45 subthreshold voltage fluctuations (Timofeev et al., 2004). While seizures can be followed by a  
46 transient postictal period characterized by abnormal brain activity and function (Fisher and Engel,  
47 2010), normal brain function is eventually restored. Another classic example of the brain's ability  
48 to recover from an extreme perturbation is general anesthesia (Brown et al., 2010). Every year,  
49 millions of patients undergo general anesthesia. While some patients experience aberrant brain  
50 activity, which manifests as delirium upon emergence (Saczyński et al., 2012), most eventually  
51 recover normal brain activity and cognitive function. During general anesthesia, the brain may  
52 exhibit dramatically abnormal activity patterns, such as burst suppression, which is caused by the  
53 hyperpolarization and silencing of more than 90% of cortical neurons (Amzica, 2009; Civillico and  
54 Contreras, 2012; Contreras and Steriade, 1997). Occasionally, complete isoelectric  
55 electroencephalogram (EEG) is observed in surgeries requiring circulatory arrest (Stecker et al.,  
56 2001). Nevertheless, once anesthetic delivery is stopped, the brain regains normal function. Given  
57 this and the fact that anesthetic delivery can be precisely controlled, general anesthesia is a good  
58 model system to address the general question of how the brain is able to restore normal activity  
59 patterns after a dramatic perturbation.

60

61 Several converging lines of evidence strongly argue that recovery from anesthesia cannot be  
62 explained by anesthetic washout alone. The first is that recovery of consciousness after  
63 anesthesia occurs at a lower anesthetic concentration than induction of anesthesia across taxa,  
64 from *Drosophila* (Joiner et al., 2013) to mice (Friedman et al., 2010) and humans (Warnaby et al.,  
65 2017). Furthermore, this neural inertia can be modulated by factors altogether unrelated to the

66 concentration of anesthetic, such as single gene mutations (Friedman et al., 2010) and  
67 manipulations of specific neuronal populations (Kelz et al., 2008; Reitz et al., 2021; Zhou et al.,  
68 2018). Together, these results strongly argue that recovery from anesthesia is not simply the  
69 byproduct of anesthetic washout. They do not, however, directly shed light on the mechanisms  
70 that allow the brain to recover after general anesthesia.

71  
72 In order to recover from anesthesia, the brain must follow a path through the state space that  
73 begins in the deeply anesthetized state and eventually leads back to the pre-anesthetic  
74 conditions. The neurophysiological processes that allow the brain to navigate this path efficiently  
75 have been addressed by Hudson et al. (2014). Specifically, they show that *en route* to recovery  
76 of consciousness, brain activity is constrained to a low-dimensional space. In this space, most  
77 activity is confined to a small number of discrete activity patterns, and the transitions between  
78 these patterns are highly structured. In sum, these mechanisms greatly constrain the number of  
79 possible paths through the activity space that can lead to wakefulness and allow the brain to  
80 recover consciousness on a physiological time scale. Abrupt transitions between discrete activity  
81 states have been observed in rodents (Hudson et al., 2014), non-human primates (Ballesteros et  
82 al., 2020; Ishizawa et al., 2016; Patel et al., 2020) and human patients (Chander et al., 2014) after  
83 exposure to a variety of anesthetics with distinct mechanisms of action. Abrupt transitions  
84 between different activity patterns at a fixed anesthetic concentration are observed not only at the  
85 level of the local field potentials (e.g., Hudson et al., 2014), but also in the activity of individual  
86 cortical neurons (Lee et al., 2020). These discrete activity patterns and structured transitions  
87 between them serve as a scaffold that guides the brain back towards normal patterns of activity  
88 after it has been profoundly disrupted by anesthetics.

89  
90 Given that state transitions are critical for reinstating consciousness, it is of fundamental  
91 importance to determine the neuronal mechanisms that give rise to transitions between discrete



92 activity states during recovery from a dramatic perturbation. Previous work on anesthesia  
93 (Chander et al., 2014; Hudson et al., 2014; Ishizawa et al., 2016) and sleep (Gervasoni et al.,  
94 2004) defined different activity patterns on the basis of oscillatory activity observed in the local  
95 field potentials (LFPs) of firing of individual neurons (Lee et al., 2020). Much of this oscillatory  
96 activity is coordinated via thalamo-cortical loops (Contreras and Steriade, 1997; Liu et al., 2015;  
97 Schiff, 2008; Steriade et al., 1993b). An extensive body of work shows that the thalamocortical  
98 circuitry is modulated by the arousal pathways ascending from the brainstem and basal forebrain  
99 to produce oscillations at different characteristic frequencies (Destexhe et al., 1994; Jones, 2003;  
100 Steriade et al., 1993a). Indeed, during constant anesthetic concentration, fluctuations in the firing  
101 rates of individual neurons within these arousal nuclei co-vary with fluctuations in the spectra of  
102 cortical LFPs (Gao et al., 2019). Direct manipulations of neuronal activity within the reticular  
103 activating system can elicit profound changes in the oscillations observed in the cortical LFP (Gao  
104 et al., 2019; Moruzzi and Magoun, 1949; Steriade et al., 1993a; Vazey and Aston-Jones, 2014).  
105 Thus, one distinct possibility is that the discrete oscillatory patterns of activity observed under  
106 fixed anesthetic concentration are imposed onto the thalamocortical networks by fluctuating  
107 modulatory tone. If this is the case, because modulatory systems project broadly across the  
108 thalamus and cortex (Jones, 2003), we expect to find that abrupt transitions between distinct  
109 oscillations occur in close temporal proximity across the different cortical layers and regions.  
110 Alternatively, it is possible that the oscillatory activity in different cortical regions is largely  
111 coordinated through short-range thalamo-cortical and cortico-cortical interactions. In this case,  
112 we expect to find that transitions between different oscillatory patterns are largely local.

113

114 Here, we provide direct experimental evidence for this latter possibility by simultaneously  
115 recording abrupt transitions between different states across cortical layers and across distant  
116 cortical areas at a constant anesthetic concentration. Using a complementary combination of  
117 analytic techniques, we show that state transitions across different cortical sites are only weakly

118 coupled. Furthermore, we demonstrate that state transitions in layer 4 (L4)—the layer that directly  
119 receives input from the thalamus—are particularly decoupled from state transitions observed in  
120 other layers. This suggests that cortico-cortical interactions rather than fluctuations in the broad  
121 modulatory tone play a crucial role in controlling state transitions under anesthesia. Remarkably,  
122 we also show that the multitude of weak pairwise interactions between local state transitions is  
123 sufficient to constrain the overall brain activity to just a few states embedded in a low-dimensional  
124 space. Thus, our results suggest that the highly coordinated, low-dimensional macroscopic brain  
125 dynamics that allow the brain to recover from a dramatic perturbation emerge as a consequence  
126 of a multitude of weak pairwise interactions between different cortical sites.

127 **Materials and Methods:**

128 **Animals**

129 All experiments were performed using ten male Sprague-Dawley rats, each two to three months  
130 of age (250–350 g) (Charles River Laboratories, Wilmington, MA). Two animals were excluded  
131 from further analyses because of excessive burst suppression or noise, respectively. One  
132 additional animal was excluded after current source density analysis revealed that the V1 probe  
133 was inserted too deeply to clearly identify cortical L4 and the supragranular layers. Rats were  
134 housed under a conventional 12:12 h, light:dark cycle and given food and water *ad libitum*. All  
135 experiments were performed in accordance with the Institutional Animal Care and Use Committee  
136 at the University of Pennsylvania and conducted in accordance with the National Institute of  
137 Health Guidelines.

138

139 **Surgery**

140 All surgeries were performed under aseptic conditions. Each animal was weighed immediately  
141 prior to surgery. Animals were induced with 2.5% isoflurane in oxygen and secured in a  
142 stereotaxic frame (Kopf Instruments, Los Angeles, CA) in the prone position. Core body  
143 temperature was maintained at 37 ( $\pm$  0.5) °C using a temperature controller (TC-1000  
144 Temperature Controller, CWE, Incorporated, Ardmore, PA). Prior to surgery, isoflurane  
145 concentration was reduced to 1.5% (flow rate 1 L/min), and dexamethasone (0.25 mg/kg) was  
146 delivered subcutaneously. Bupivacaine (5 mg/mL) was injected under the scalp to provide local  
147 anesthesia. Throughout the surgery, the lack of response to a toe pinch was used to assess  
148 proper anesthetic depth.

149

150 The scalp was retracted and two 2 x 2 mm craniotomies were performed using a dental drill: one  
151 centered over -5.52 mm AP, 4 mm ML of bregma and another centered over -1.26 mm AP and  
152 1.55 mm ML of bregma for V1 and M1 sites respectively. Dura was removed and Gelfoam (Pfizer,

153 New York, NY) was placed on the exposed cortical tissue to prevent the tissue from desiccating.  
154 Prior to insertion, both linear probes (Cambridge NeuroTech, Cambridge, UK; H3 acute 64-  
155 channel linear probe) were dipped in Dil to allow for subsequent track tracing and lowered to 1.2  
156 mm into the brain. Prior to electrode insertion, Dura Gel (Cambridge NeuroTech) was applied to  
157 each craniotomy and isoflurane concentration was lowered again to 1% (flow rate 1 L/min) for  
158 recordings. Immediately following electrophysiological recordings, animals were perfused trans-  
159 cardially with 4% paraformaldehyde under 4% isoflurane. Brain was harvested and processed  
160 for electrode track tracing.

161

### 162 **Histological confirmation of recording sites**

163 Brains were sectioned at 80 $\mu$ m on a vibratome (Leica Microsystems, Wetzlar, Germany). Sections  
164 were mounted with medium containing a DAPI counterstain (Vector Laboratories, Burlingame,  
165 CA). Electrode tracks were manually identified and localized using epifluorescence microscopy  
166 (Olympus, Tokyo, Japan; BX41) at 4x magnification.

167

### 168 **Electrophysiology and Preprocessing**

169 All recordings were performed at 1% isoflurane, after allowing the anesthetic concentration to  
170 equilibrate for at least 30 minutes. Signals were amplified and digitized on an RHD2132  
171 headstage (Intan, Los Angeles, CA) and streamed to a PC using an Omniplex acquisition system  
172 (Plexon, Dallas, TX) at a rate of 40,000 samples per second per channel. All recordings were  
173 performed using a ground skull screw as reference. Local field potentials (LFP) were extracted  
174 from raw signals online using the bandpass filter with a passband of 0.1-300 Hz. Offline, LFP  
175 were decimated to 1 kHz and filtered using a custom acausal FIR 0.1–200 Hz bandpass filter.  
176 Noisy channels were removed by visual inspection of the signals. Before subsequent analyses,  
177 data were re-referenced to the mean computed over all clean channels on the laminar probe. All  
178 data analysis was completed using custom built MATLAB (MathWorks, Natick, MA) code unless

179 otherwise stated. In total, 29.88 hours of recordings were used to generate all data in this  
180 manuscript.

181

## 182 **Current Source Density and Channel Selection**

183 In order to facilitate cortical layer localization, a series of 10 ms light flash stimuli was presented  
184 from a green LED positioned about one inch from the eye contralateral to the craniotomy over V1.  
185 Interstimulus intervals were drawn from a uniform distribution between 3 and 5 seconds to prevent  
186 stimulus entrainment. Current source density (CSD) analysis was then applied to the post-  
187 stimulus LFP to identify layers in V1. The CSD  $C_t$  at time  $t$  was calculated by computing a  
188 smoothed second spatial derivative (a representative example is shown **Figure 5**):

$$C_t(z) = V_t(z) * K(z)$$
$$K(z) = \frac{z^2 - \sigma^2}{\sigma^5 \sqrt{2\pi}} \exp\left(\frac{-z^2}{2\sigma^2}\right)$$

189

190 Here,  $z$  is the channel depth,  $\sigma = 280 \mu\text{m}$  is the distance along the electrode from  $z$  at which the  
191 kernel changes sign,  $V_t$  is the mean voltage over all light flash trials at time  $t$  relative to flash onset,  
192 and  $*$  indicates convolution. The electrode closest to the center of L4 was identified manually from  
193 the CSD as the earliest current sink. Once L4 was identified, supra- and infragranular channels  
194 were selected for analysis at  $140 \mu\text{m}$  intervals above and below L4.

195

## 196 **Time-Frequency Analysis**

197 Spectrograms of selected channels were calculated from LFP signals using the multitaper method  
198 with 17 Slepian tapers and time-bandwidth product (NW) = 9. A 6-second sliding window with a  
199 step size of 100 ms was used. Windows containing signal artifacts were identified and removed  
200 using a combination of automatic burst suppression detection based on the root-mean-square of  
201 LFP in a moving exponential window and manual inspection of multitaper spectrograms. Each  
202 window was zero-padded to 65.536 s to increase the frequency resolution and input a power-of-

203 2 number of samples to the Fourier transform. In order to sample frequencies of greater interest  
204 more densely, 279 frequencies were selected from 0.14 to 300 Hz, spaced on a log scale from  
205 0.14 to 10 Hz and on a linear scale above 10 Hz. The multitaper spectrograms were then  
206 smoothed over frequencies with a median filter spanning 10 frequency steps (up to 17.5 Hz) and  
207 over time with an exponential (Poisson) window spanning 2 minutes. In order to remove baseline  
208 differences in power across frequencies (such as power-law scaling) and emphasize temporal  
209 fluctuations, each spectrogram was rank-order normalized along the time axis. At each frequency  
210 bin, the time window with the highest power was given the value of one. Each other window was  
211 given the value of  $(r-1)/(N-1)$ , where  $r$  is that window's sorted index among the  $N$  windows. Thus,  
212 the smallest power value at each frequency was represented as zero, and the largest as one.

213

#### 214 **Dimensionality Reduction**

215 Dimensionality reduction was performed on each channel's spectrogram individually, in order to  
216 obtain high reconstruction accuracy and ensure that any characteristic differences in activity  
217 patterns between sampled regions and cortical depths were preserved. Non-negative matrix  
218 factorization (NMF) (Lee and Seung, 1999; Mankad and Michailidis, 2013) was used to compress  
219 the rank-ordered spectrograms. The NMF output represents the signal at each time as a short  
220 vector of  $K$  non-negative coefficients (scores) that weight a sum of corresponding frequency  
221 components (loadings) to reproduce the original spectrum. Given a spectrogram  $A$  of size  $279 \times$   
222  $N$ , NMF produces a loading matrix  $U$  of size  $279 \times K$  and a score matrix  $V$  of size  $N \times K$ . The  
223 product  $UV^T$  reconstructs  $A$  with some error  $E$ , quantified relative to the norm of  $A$  as:

$$E = \frac{\|A - UV^T\|_F}{\|A\|_F}$$

224

225 Where  $\|\cdot\|_F$  is the Frobenius norm. To select an appropriate number of components ( $K$ ) for each  
226 channel, a cross-validation approach was employed (Owen and Perry, 2009). First, spectrograms

227 were downsampled across time by a factor of 20, for computational efficiency. Then, a random  
228 subset of 20% of the rows and columns were selected to be withheld. Starting with  $K = 1$  and  
229 increasing to 15, NMF was applied to the down-sampled matrix after the random subset of rows  
230 and columns had been removed. This iteration provides both a loading and score matrix. Next,  
231 NMF was run again on the data with only the pre-selected rows withheld. In this iteration, the  
232 loading matrix from the first round was fixed and only a new score matrix was calculated. In the  
233 third and final run of NMF, NMF was run on the data with only the pre-selected columns removed,  
234 fixing the score matrix from the first round and calculating only a new loading matrix. Finally, the  
235 loading and score matrices produced in the second and third run of NMF, respectively, were  
236 multiplied to generate an estimate of the original dataset and calculate error as a function of  $K$ .  
237 This procedure was repeated for five replicates for each value of  $K$ , and the optimal  $K$  was chosen  
238 such that increasing  $K$  by one would reduce mean reconstruction error by less than 1%. In our  
239 dataset, the optimal value for  $K$  ranged from five to nine for different channels. After the cross-  
240 validation procedure, each channel's full, normalized spectrogram was subjected to NMF using  
241 the channel's optimal  $K$ , resulting in a mean reconstruction error of 14.8% across all channels  
242 (~85% of the variance captured by NMF for each spectrogram). Note that NMF does not constrain  
243 the relative scales of the loading vectors: for any invertible diagonal  $K \times K$  matrix  $D$ ,  
244  $UV^T = UD(VD^{-1})^T$ . To remove these degrees of freedom,  $U$  and  $V$  were rescaled by a matrix  $D$   
245 such that the rescaled loadings had unit  $L_2$  norm.

246

## 247 **Transition and Discrete State Identification**

248 The rescaled score matrix  $VD^{-1}$  is the basis for defining each channel's state over time. For each  
249 channel, at each time point, the component with the highest score was taken as the state of the  
250 brain near that channel's recording site, and samples where the state changed were marked as  
251 local transition times. In order to prevent an arbitrarily high number of transitions during periods  
252 when two or more components had similar scores, transitions that were likely to reflect transient

253 fluctuations were ignored and the state assignments between them were updated accordingly.  
254 Specifically, suppose one time segment between two transitions was assigned state “A” and either  
255 the previous or next segment was assigned state “B.” If the first segment was less than 100  
256 seconds long and, within the first segment, the mean score for NMF component A was less than  
257 1.1 times the mean score for component B (*i.e.*, if the state assignment was sufficiently  
258 ambiguous), the transition between the two segments was ignored and the combined segment  
259 was assigned state B. If a segment could be merged with either the previous or next segment,  
260 the tie was broken by ignoring the transition with a smaller magnitude of change in the full NMF  
261 score vector from the 3 seconds before the transition to the 3 seconds following it. A matrix of  
262 state transition frequencies was computed by tabulating how often each discrete state followed  
263 each other state over the duration of the recording using the table of discrete state transitions for  
264 each channel.

265

### 266 **Markov-based Shuffled Null Model**

267 When testing whether pairs of channels are synchronized in the sense that they preferentially  
268 occupy certain combinations of discrete states, apparent synchrony could arise due to the  
269 channels’ individual NMF score distributions, independent of the relative timing of transitions. To  
270 control for this possibility, a discrete-time Markov chain (the “null model”) was fit to the transition  
271 frequencies of each channel independently. The channel’s null model was then used to simulate  
272 1000 new discrete state sequences of the same length as the original data. For each pair of  
273 channels, these “null” state sequences were then used to fit distributions of transition synchrony  
274 and normalized mutual information (see corresponding sections below). This distribution reflects  
275 the probability of observing a given state synchrony and mutual information under the assumption  
276 of complete independence between different recording sites. To obtain a null distribution of  
277 canonical correlation-based synchrony (see below), full score matrices were generated from each  
278 channel’s null state sequences as follows: for each of the  $K$  states  $k$ , at each sample with null



279 discrete state assignment  $k$ , the corresponding row of the null score matrix was randomly drawn  
280 from the set of rows of the original data score matrix where the original discrete state was equal  
281 to  $k$ . These random sequences for all pairs of channels were then subjected to canonical  
282 correlation analysis.

283 After fitting normal distributions for each of the three channel pair interaction measures (transition  
284 synchrony, normalized mutual information, and canonical correlations) to the shuffled surrogates,  
285 the values obtained for the real data were tested against these distributions to estimate whether  
286 they would be expected by chance, given the statistics of the data (see “Statistical Tests” below).

287

### 288 **Transition Synchrony**

289 To quantify how frequently channels transitioned together we employed the SPIKE-  
290 synchronization score (“synchrony score”), a method for quantifying synchrony between two  
291 simultaneously recorded sequences of events (Kreuz et al., 2015). At its core, this method is a  
292 coincidence detector in which the coincidence window is derived from the dataset. The adaptive  
293 definition of the coincidence window means that this method for quantifying synchrony is equally  
294 well-suited for state transitions as it is to spike trains. Each transition  $r$  is assigned a local window  
295 length  $\tau(r)$ , which is defined as half the smaller of the inter-transition intervals directly before and  
296 after  $r$ . For a pair of channels  $i$  and  $j$ , if transition  $r_j$  in  $j$  was the closest transition to transition  $r_i$  in  $i$   
297 and vice versa, and the time between  $r_i$  and  $r_j$  is less than  $\min(\tau(r_i), \tau(r_j))$ , both transitions have a  
298 synchrony score of 1. All other transitions have a score of 0. This measure is extended to the  
299 multi-channel case by assigning each transition a synchrony score equal to its mean pairwise  
300 synchrony score with the nearest transitions in all other channels. Both pairwise and all-channel  
301 synchrony scores were computed for all discrete state transitions in each recording, and then  
302 averaged over all transitions to obtain pairwise and global mean synchrony measures.

303

304

## 305 **Normalized Mutual Information**

306 Mutual information of discrete states was used to quantify the synchrony of states themselves  
307 rather than just the timing of their transitions. Specifically, this measure was implemented to  
308 quantify how well one could predict the state in one channel, given the state of another channel  
309 at the same time point. Since NMF was performed separately on each channel, states labeled  
310 with the same index in different channels are not necessarily the same with respect to the  
311 frequency characteristics of the signal. Regardless, mutual information is able to reveal temporal  
312 relationships between channel pairs because it does not assume any particular relationship  
313 between the state assignments of the different channels and is, therefore, agnostic to the  
314 assignments themselves.

315

316 Mutual information  $I(X; Y)$  between two channels  $X$  and  $Y$  with  $N$  observations and sets of classes  
317  $K_X$  and  $K_Y$  was computed pointwise as follows:

$$I(X; Y) = I(Y; X) = H(Y) - H(Y | X)$$

$$H(Y) = - \sum_{k \in K_Y} P(Y = k) \log_2 P(Y = k)$$

$$H(Y | X) = - \sum_{j \in K_X} P(X = j) \sum_{k \in K_Y} P(Y = k | X = j) \log_2 P(Y = k | X = j)$$

$$P(Y = k) = \frac{|\{t | Y[t] = k\}|}{N}$$

$$P(Y = k | X = j) = \frac{|\{t | X[t] = j, Y[t] = k\}|}{|\{t | X[t] = j\}|}$$

318

319 Mutual information is not a pure measure of the predictability of one variable given the other; it  
320 also increases with the entropy of each variable. For example, if channels  $X$  and  $Y$  each occupy  
321 a wider distribution of states and, as a result, have higher entropy than both channels  $W$  and  $Z$ ,  
322 then  $I(X; Y) > I(W; Z)$ . This is true even if the state of  $X$  is perfectly predictable given  $Y$ ,  $Y$  given  
323  $X$ ,  $W$  given  $Z$ , and  $Z$  given  $W$ . In order to control for this, mutual information was normalized by

324 the sum of the entropies of the two channels, giving the normalized mutual information, or  
325 symmetric uncertainty (Witten et al., 2011):

$$326 \quad U(X, Y) = 2 \frac{I(X; Y)}{H(X) + H(Y)}$$

327 Using another definition for mutual information in terms of the individual and joint entropies of  $X$   
328 and  $Y$ , we can write:

$$329 \quad U(X, Y) = 2 \frac{H(X) + H(Y) - H(X, Y)}{H(X) + H(Y)}$$

330 Thus, normalized mutual information can be understood as twice the fraction of the sum of  
331 individual entropies,  $H(X) + H(Y)$ , that exceeds (is redundant to) the joint entropy  $H(X, Y)$  due to  
332 mutual information between  $X$  and  $Y$ . For example, if  $X$  and  $Y$  are identical,  $U(X, Y) = 1$  and 50%  
333 of  $H(X) + H(Y)$  is redundant, as only one of the variables carries unique information.

334

### 335 **Canonical Correlation**

336 Both the transition synchrony and normalized mutual information measures assume that LFP  
337 signals at each channel form discrete states and that the sequence of NMF components with the  
338 largest magnitude at each time point is informative about this state. However, there may be cases  
339 where multiple components must be considered. For instance, consider a situation in which NMF  
340 component  $A$  in channel  $i$  is characterized by strong activity in two frequency bands, and  
341 components  $B$  and  $C$  in channel  $j$  are characterized by strong activity in one of those frequency  
342 bands each. If only the “top” component determines the discrete state, there could be artificially  
343 low synchrony and mutual information between channels  $i$  and  $j$ . This is because, during a bout  
344 of state  $A$  in channel  $i$ , there could be frequent switching between states  $B$  and  $C$  in channel  $j$ ,  
345 even though the overall signal characteristics in channel  $j$  remain largely static. To address this  
346 kind of ambiguity and compute a state synchrony measure that softens the artificially sharp  
347 boundaries between “discrete states,” canonical correlation analysis (CCA) was applied to the

348 NMF score matrices of pairs of channels. Intuitively, CCA allows each score matrix to be linearly  
349 transformed to optimally match components between channels. CCA maximizes the correlations  
350 between the matched, transformed components. These correlations are used to derive a measure  
351 of state similarity.

352

353 The procedure for computing CCA-based synchrony is as follows: let  $V \in \mathbb{R}^{N \times L}$  and  $W \in \mathbb{R}^{N \times M}$  be  
354 the NMF score matrices two channels, and let  $K = \min(L, M)$ . At each step  $i$  from 1 to  $K$ , CCA  
355 finds coefficient vectors  $a_i$  and  $b_i$  to maximize the correlation  $\rho_i = \text{corr}(Va_i, Wb_i)$ , with the  
356 constraints that  $a_i$  is uncorrelated with all previous vectors  $a_1, \dots, a_{i-1}$ , and likewise for  $b_i$ . The  
357 MATLAB function *canoncorr* was used to perform this algorithm and the canonical correlation  
358 coefficients  $\rho_1, \dots, \rho_K$  were averaged to obtain a state similarity measure.

359

## 360 **Statistical Tests**

361 This section describes the procedure used to establish the statistical significance of interactions  
362 between recordings sites as measured by the synchrony score, normalized mutual information,  
363 and canonical correlation analysis. For each channel pair under consideration and each of these  
364 three interaction measures, the measure was computed both on the experimental dataset and on  
365 a set of 1000 null-model datasets generated from discrete Markov models of each channel's  
366 transition statistics, as described above. The values of each measure were approximately  
367 normally distributed across null-model datasets. To test statistical significance, the deviation of  
368 each measure obtained in the experimental dataset from those generated from null-model  
369 datasets was expressed as a z-score. The one-tailed  $p$ -value was then directly computed from  
370 the z-score. The significance threshold was set at  $\alpha=0.05$ . Bonferroni correction was applied to  
371 account for multiple comparisons over all channel pairs in each animal. The percentage of pairs  
372 for which each interaction measure was different from chance after Bonferroni correction is  
373 reported in the manuscript, and non-significant pairs are grayed out in Figures 6-8.

374

375 To compare interaction measures between different sets of channel pairs, special consideration  
376 must be paid to the statistical dependence between observations. In a recording with  $n$  channels,  
377 for any channel  $k$ , one would not in general expect the values of a distance-like measure on the  
378 pairs  $(k, 1), \dots, (k, k-1), (k, k+1), \dots, (k, n)$  to be independent. For example, if channel  $k$  were an  
379 outlier, all  $n-1$  pairs would take extreme values due to what is statistically only one extreme  
380 observation. If pairwise statistics were compared naively, e.g., using a two-sample  $t$ -test, these  
381 dependencies would result in an overestimation of effective sample size and thus significance.  
382 Instead, a Monte Carlo permutation procedure was used to establish null distributions for  
383 comparisons of pairwise measures between groups of channel pairs. This procedure randomly  
384 shuffled group assignments while preserving the dependency structure inherent in the matrix of  
385 pairwise measures by only shuffling rows and columns. For each such comparison,  $10^7$   
386 permutations of only the channels of each recording that were included in that comparison were  
387 conducted, and the difference of group means was computed after each permutation. The  
388 frequency with which these null differences exceeded the difference of means of the unpermuted  
389 groups was taken as the  $p$ -value of the comparison.

390

391 Finally, when comparing the interaction measures for between-region channel pairs in M1/V1  
392 recordings to those in bilateral V1 recordings, the method of permuting channel labels cannot be  
393 used because there are no data for pairs of channels that mix different recordings. Instead, the  
394 distribution for the difference of means of the measure over pairs between the two sets of  
395 recordings was estimated by bootstrapping over channels. Specifically, each group in such a  
396 comparison consists of a set of rectangular matrices, containing values of the measure for each  
397 pair of one channel along the rows and one channel along the columns. By resampling both rows  
398 and columns with replacement in each such matrix, the dependencies along rows and columns  
399 were preserved, but the variance in the mean could be estimated thanks to the principles of

400 bootstrapping. A total of  $10^6$  bootstrapped estimates of the group mean difference were computed  
401 in this manner for each interaction measure and used to obtain a  $p$ -value for the one-tailed  
402 hypothesis that the measure is greater on average between hemispheres of V1 than between M1  
403 and V1.

404 **Results:**

405 **State transitions under constant anesthetic can be local.**

406 We sought to determine whether state transitions under a fixed concentration of isoflurane (1%  
407 atm.) occur simultaneously across different cortical regions and across layers within the same  
408 cortical region. This concentration was chosen based on previous work (Hudson et al., 2014)  
409 showing that burst suppression is not likely to occur at this concentration, but that state transitions  
410 in the spectral characteristics of the LFP are frequently observed. Here we focused on the local  
411 field potentials (LFPs) recorded using two laminar probes that sampled signals across all cortical  
412 layers. In half of the experiments, both electrodes were inserted into the right hemisphere: one in  
413 the primary visual area (V1) and the other in the motor cortex (M1) (n = 3) (**Figure 1A**). In the

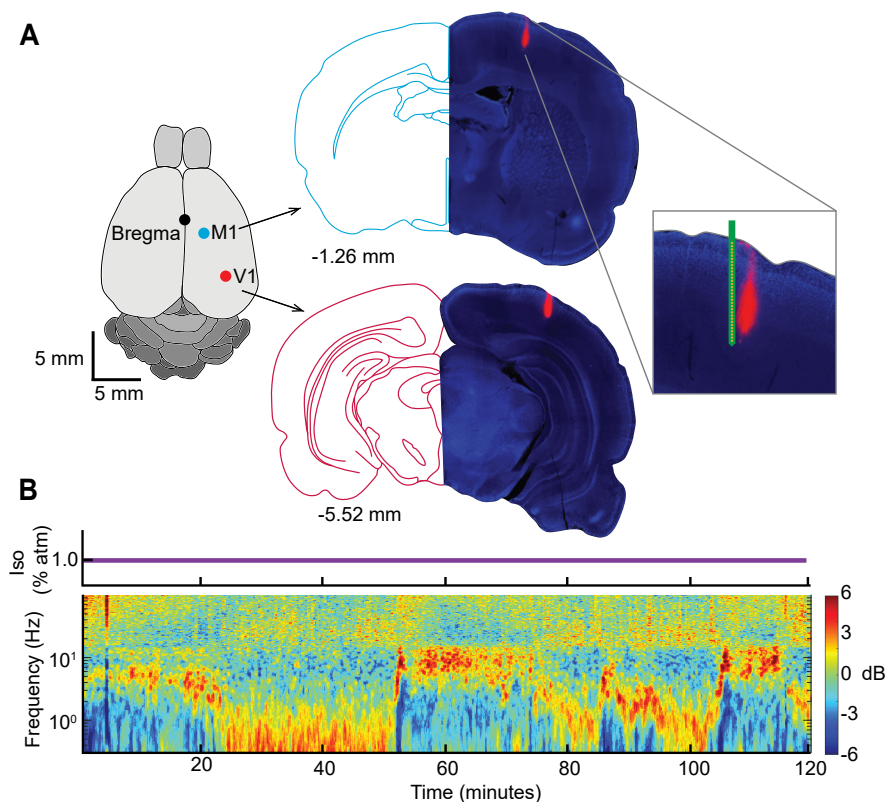

**Figure 1: Experimental setup. A.** Verification of Electrode placement into V1 and M1. DAPI-stained histological section showing tracks of the Dil-dipped electrode (right) juxtaposed with the corresponding section from the rat brain atlas (left). The zoomed cutout includes an image to show electrode channel layout. **B.** Time-resolved spectrogram recorded from V1 under 1% isoflurane general anesthesia (concentration shown above spectrogram). Spectrogram is plotted as deviations from temporal mean.

414

415 other half of experiments, bilateral V1 recordings were performed ( $n = 4$ ). Postmortem localization  
416 of electrodes (Methods) in a representative experiment is shown in **Figure 1B**. Consistent with  
417 previous findings (Hudson et al., 2014), at 1% isoflurane, the power spectrum of the LFP  
418 fluctuated between several discrete states (**Figure 1C**).

419  
420 State transitions can be readily identified in the raw LFP (**Figure 2**). The top and bottom LFP  
421 traces show one minute of recordings from a single M1 and V1 electrode, respectively. The  
422 accompanying spectra were calculated using a multitaper spectral estimate. These spectra were  
423 averaged across two second windows of LFP with a one second step size, sampled either from  
424 eight to two seconds prior to transition (black, pre-transition) or from two to eight seconds after  
425 the transition (red, post-transition). Spectral estimates are shown as mean  $\pm$  95% confidence  
426 interval computed from 1000 bootstraps. In some instances, state transitions occur approximately  
427 simultaneously in the motor and visual cortices (**Figure 2A**). However, this was not always the  
428 case. For instance, **Figure 2B** shows an example of a state transition that occurs first in the visual  
429 cortex and, only after a delay of approximately 10 seconds, is seen in the motor cortex. Thus,  
430 abrupt changes in the LFP characteristics need not occur simultaneously in different brain  
431 regions. **Figure 2C** shows a more extreme example of this phenomenon. A state transition is  
432 clearly seen in the motor cortex, but in the visual cortex, the LFP characteristics remain  
433 unchanged. These observations suggest that, while some state transitions may indeed be global,  
434 there is a previously unappreciated degree of independence between state fluctuations observed  
435 in the cortex during fixed anesthetic administration.

436  
437 **Multitaper analysis and non-negative matrix factorization extract states and their**  
438 **transitions across cortical layers and regions.**

439 To quantify the degree of coupling between state transitions at different recording sites, we  
440 developed a methodology to automatically detect state transitions at the level of individual



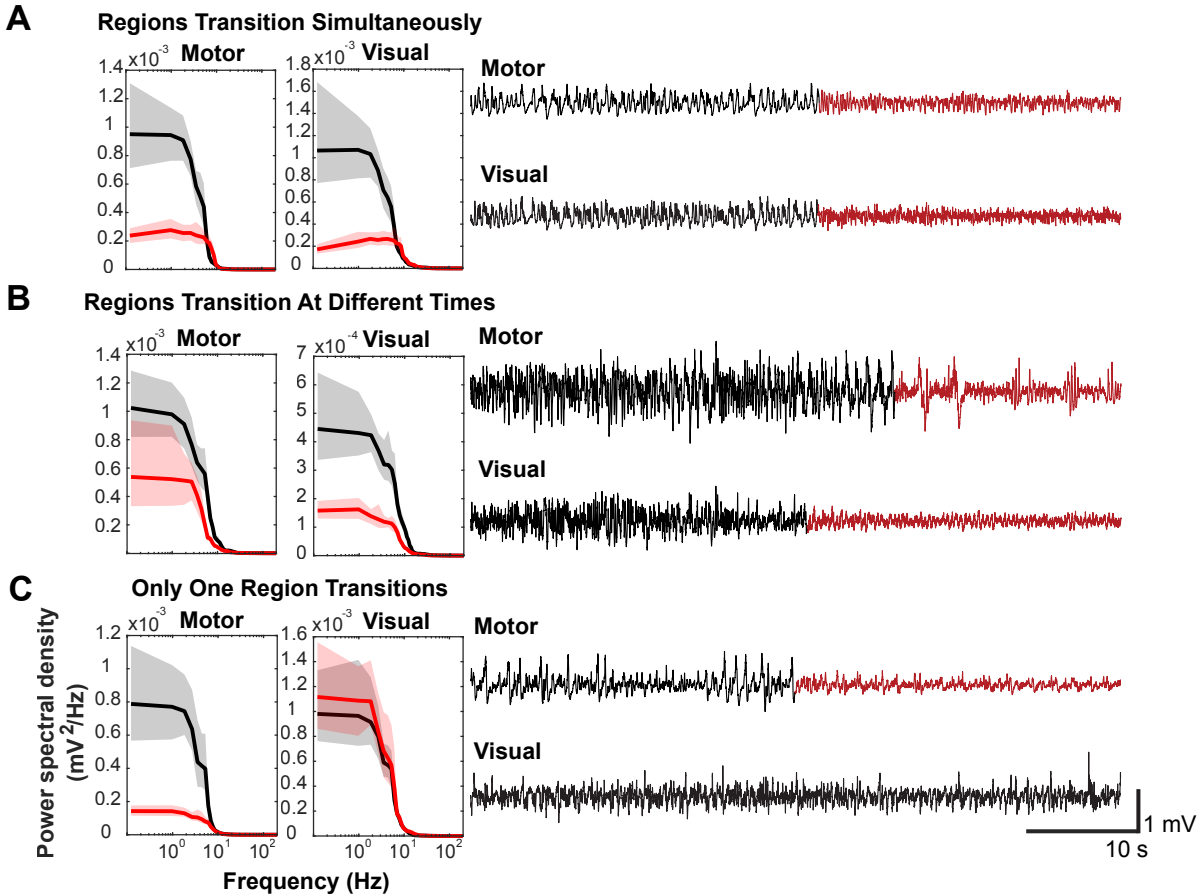

**Figure 2: Examples of state transitions.** A-C Right: LFP traces (1 minute) recorded simultaneously from right M1 and V1. Visually apparent abrupt transitions in the character of the LFP are indicated by shifts of color from black to red. Left: spectra computed from the red and black time periods respectively to indicate that the abrupt switches in the features of the signals are associated with changes in the spectra. **A.** An example where both M1 and V1 LFPs appear to change state simultaneously. **B.** An example where both M1 and V1 signals change states but with an appreciable time delay ( $\sim 10$  s). **C.** An example where a state transition is observed in M1 but not in V1. In this case for the purposes of computing the spectrum (left, red) in V1, the time segment highlighted in red for the M1 electrode was used.

441

442 channels (Methods). We then deployed this methodology to determine the degree to which

443 transitions in different cortical sites are coupled. **Figure 3** is a flowchart of the initial analysis steps.

444 The first step in the analysis is to compress the LFP recording into a low-sample-rate, low-

445 dimensional matrix that accurately captures fluctuations in oscillatory activity. The right side of the

446 figure presents an example five-minute window of data from one recording site to demonstrate

447 the outcome of each step. Briefly, wideband data were filtered between 0.1 and 300 Hz to extract

448 the LFP signal. (**Figure 3A**) LFP signals were converted to frequency domain using multitaper  
449 spectral analysis, (**Figure 3B**). Raw power spectra were then normalized such that the power  
450 contained in each frequency band was mapped onto a value between 0 (smallest observed  
451 power) and 1 (largest observed power) (**Figure 3C**). Non-negative matrix factorization (NMF) was  
452 used to further decompose the signal into a set of loadings and associated scores across time  
453 (**Figure 3D-E**).

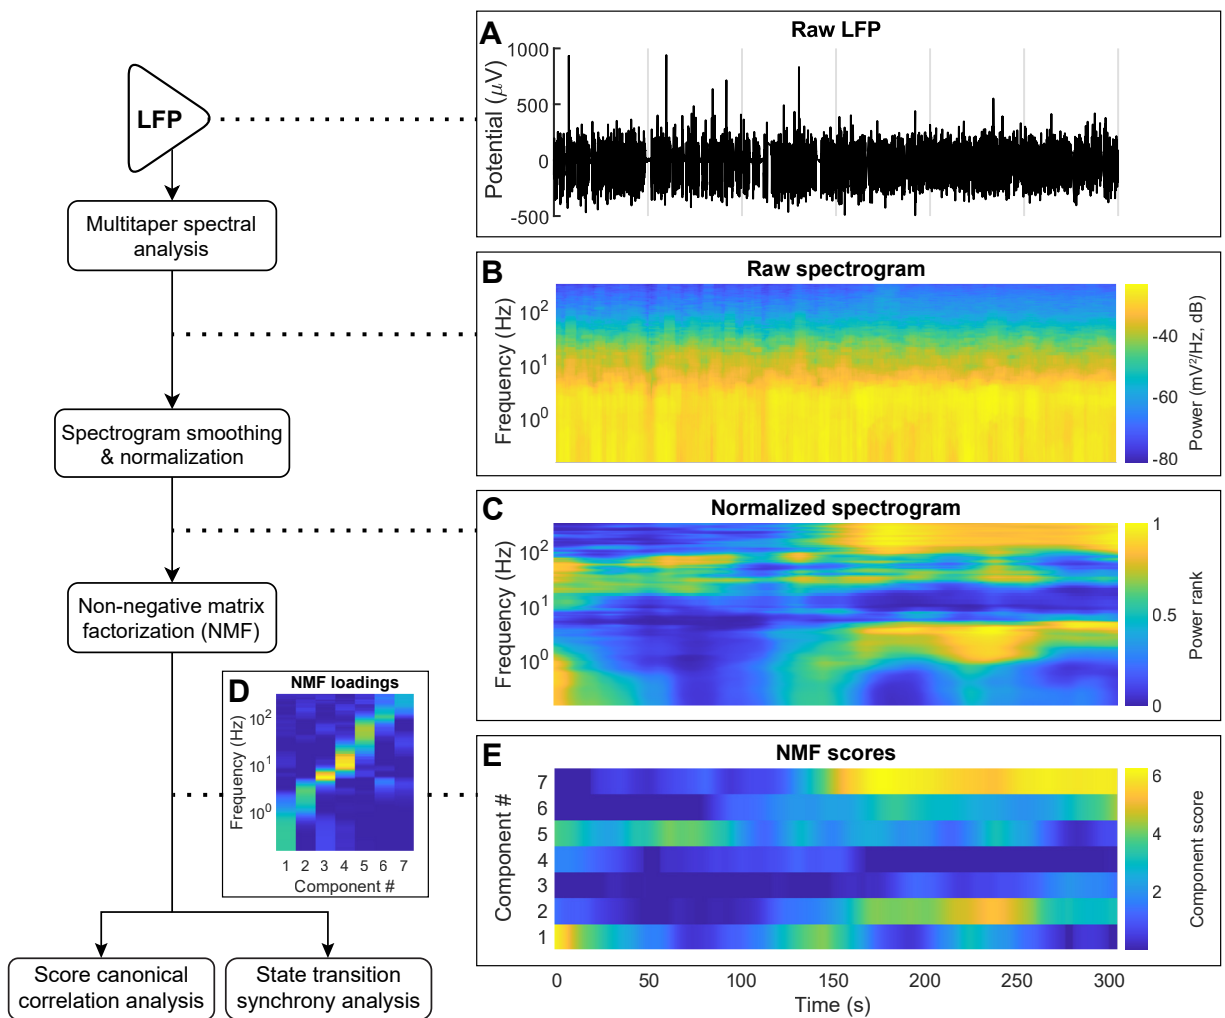

454

455 NMF can be thought of as a “soft” clustering algorithm. Previous work on state transitions under  
456 anesthesia (Hudson et al., 2014) and sleep (Gervasoni et al., 2004) used k-means clustering of  
457 the spectrograms to assign the state of the brain. Our first approach to state assignment used a  
458 similar strategy—the index of the NMF component with the highest score in each time window  
459 was defined as the state of the LFP at each recording site (Methods). This assumption was  
460 relaxed in subsequent stages of the analysis (see below). **Figure 4A** shows the score matrices  
461 for two different channels recorded simultaneously from two contacts along the same electrode  
462 in the motor cortex. The upper matrix is the same as **Figure 3E**, and the lower matrix was  
463 generated from data collected by a contact 140  $\mu\text{m}$  deeper inside the cortex. Notice that these  
464 matrices resemble one another but are not identical. **Figure 4B** shows state classifications for 18  
465 channels of simultaneously recorded data: nine from an electrode in V1 and nine from an  
466 electrode in M1. Note again that some state transitions are observed around the same time in  
467 most of the electrodes. There are, however, many instances where state transition is observed in  
468 just a subset of the recording sites.

469  
470 One way to characterize the coupling between state transitions is to quantify the propensity of  
471 state transitions to occur simultaneously across different recording sites. Brain state transitions  
472 were defined as time points at which consecutive windows from the same channel have different  
473 brain state assignments (Methods). **Figure 4C** shows an example of this analysis. There are  
474 many transitions that appear in only one or very few channels, while others appear to be more  
475 global. **Figure 4C** is a raster plot of transitions. The color of each line shows the synchrony score  
476 of that transition with all other channels (Methods). Consistent with the observations in **Figure 2**  
477 and **4C**, the synchrony score reflects the fact that most state transitions are localized to a small  
478 subset of electrodes.

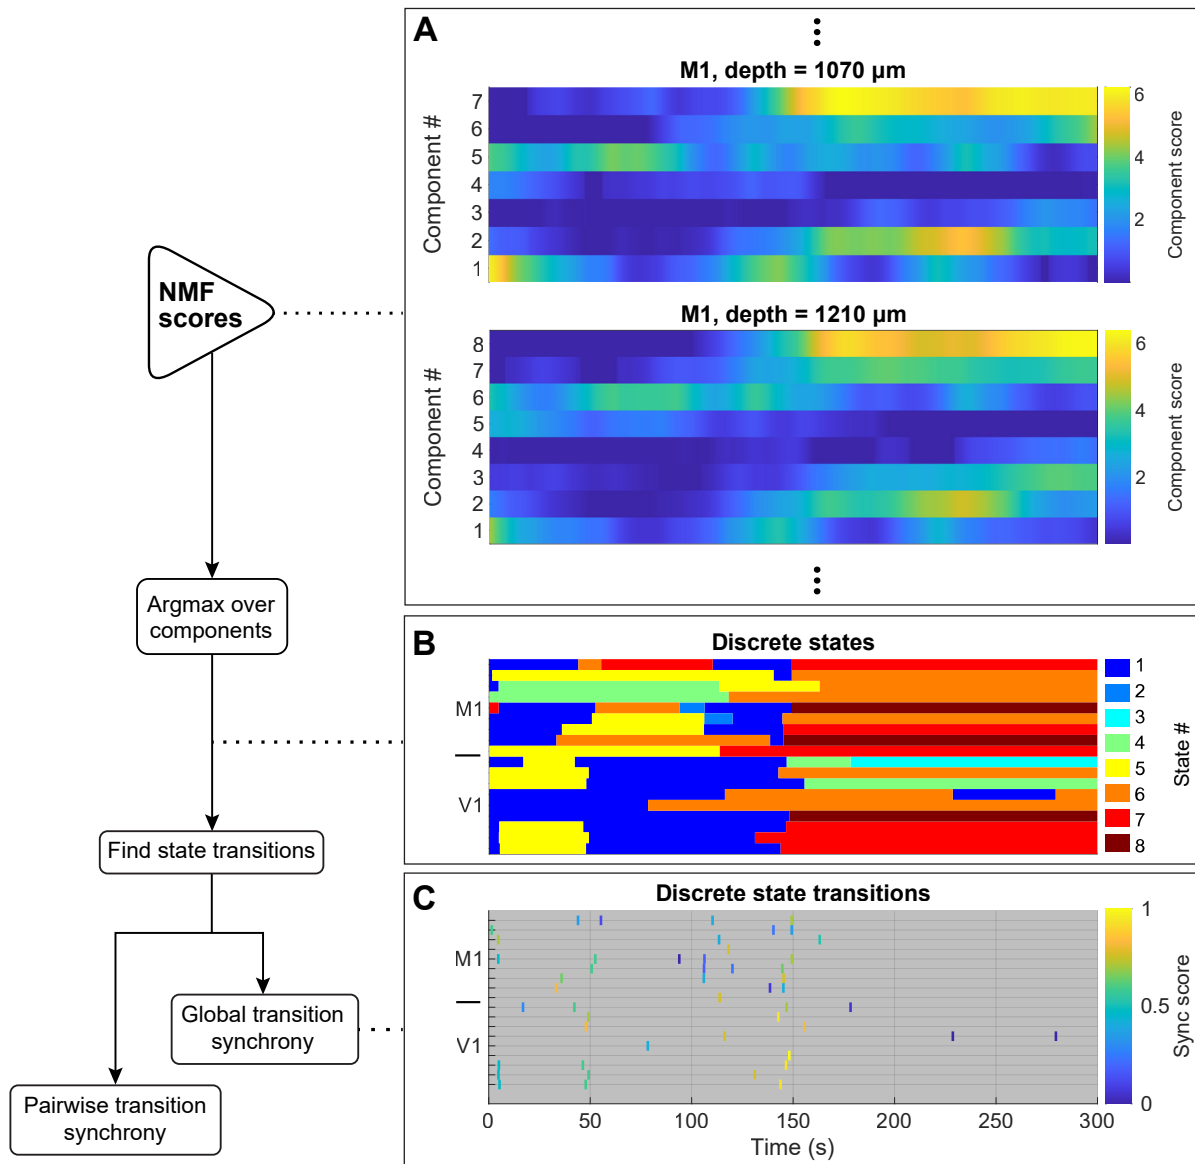

**Figure 4. Schematic of NMF score analysis to define state transitions and synchrony.**

Left: Flowchart of analysis steps. Right: **A**. The NMF score matrix presented in Figure 3E (upper) and another NMF score matrix from simultaneously collected LFP from a neighboring channel (lower). Note that while nearby channels share similar characteristics across time, they are not identical. Also, the two channels have different optimal number of components, since NMF was performed and optimized (Methods) independently for each channel. **B**. State assignments across example time window from 18 simultaneously recorded signals: 9 signals from an M1 (top rows) electrode and 9 from V1 (bottom rows). State # indicates the NMF component with the highest score in each time window, after removing state segments that were both short and ambiguous due to small score fluctuations (Methods). **C**. Raster plot of all transition times from the channels presented in panel **B**. Transitions are colored according to their synchrony (sync score) with transitions in all other channels (Methods).

480 As we show below, coupling between state transitions depends on the cortical layer. Layer  
481 assignment in V1 was performed using current source density (CSD) analysis computed  
482 immediately following brief light stimulus (Methods). **Figure 5** shows a representative example of  
483 CSD in V1 showing the stereotypical pattern of response to visual stimuli. The first current sink  
484 occurs approximately 33 ms following stimulus presentation in L4. A short time after, additional  
485 sinks and sources appear above and below, revealing interlaminar communication. The channel  
486 where the initial sink occurred was defined as the center of L4. The dashed black lines in this  
487 figure mark the approximate boundaries of L4 based on the average thickness of this layer in rats  
488 and the spacing between channels (Einevoll et al., 2013; Quairiaux et al., 2011; Self et al., 2013).  
489 In the motor cortex, we did not estimate the location of cortical layers directly. Instead, we  
490 estimated the depth of each recording electrode relative to the cortical surface.

491

492

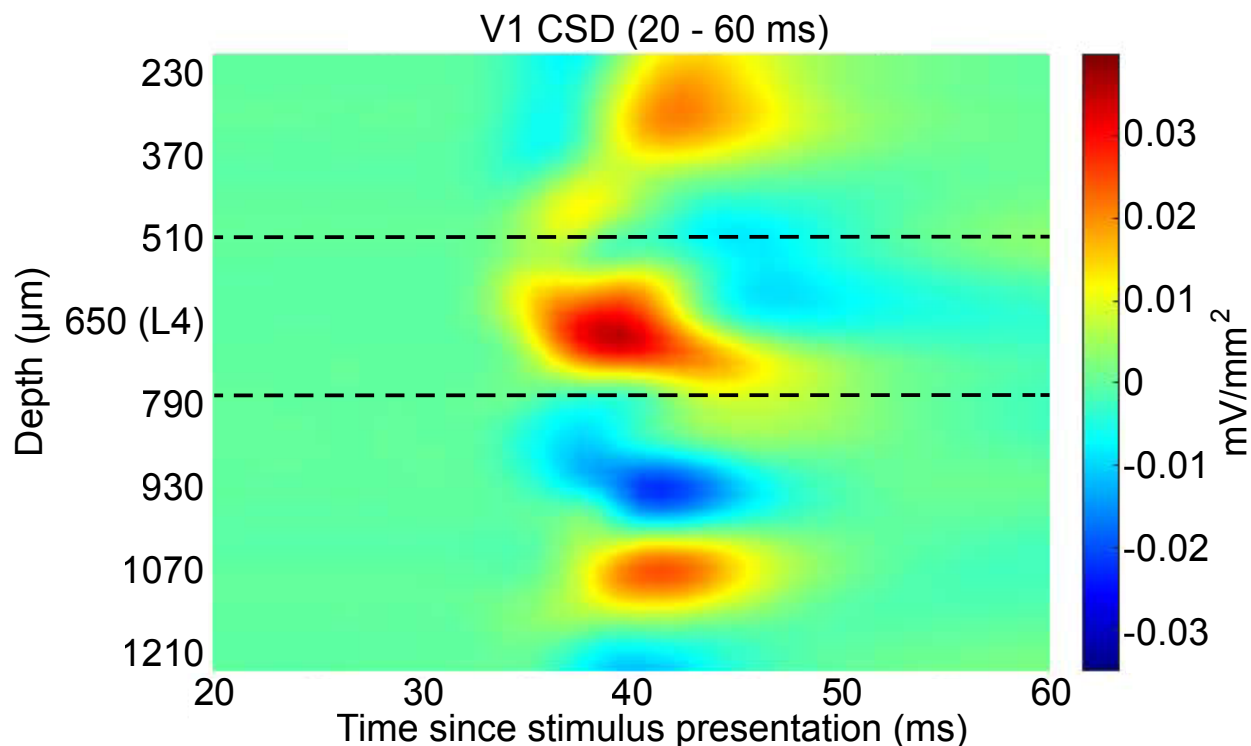

**Figure 5. Current source density computed for a representative V1 recording.** Evoked potential was elicited using a brief green LED flash (Methods). Dotted lines indicate the approximate boundaries of L4. Depth denotes estimated depth from the cortical surface.

493

494 **State transitions in different cortical sites exhibit weak synchrony.**

495 We used three different analytical techniques to quantify the tendency of oscillatory states and  
496 the transitions between them to be coordinated across recording sites. Each technique relies on  
497 a different set of assumptions and was performed on a different feature of the data. First, we  
498 quantified the synchrony of transitions, as demonstrated in **Figure 4** (Methods). **Figure 6A-B**  
499 shows the cumulative distribution of synchrony scores (red curves) computed over all channel  
500 pairings and across all animals (M1/V1: 3 animals, 16–18 electrodes/animal, median of 99  
501 transitions/electrodes/animal; bilateral V1: 4 animals, 15–19 electrodes/animal, median of 175.5  
502 transitions/electrode/animal).

503

504 In order to compare the synchrony scores (**Figure 6A-B**) to those expected by chance, we  
505 generated shuffled datasets constrained to have the same state transition statistics. This was  
506 accomplished by simulating a Markov process defined by the state transition probability matrix  
507 derived from state assignments for each recording (Methods). This control preserves the statistics  
508 of each recording site, while destroying any coordination between them. The cumulative  
509 distributions of the synchrony scores obtained in these shuffled controls are shown in **Figure 6A-**  
510 **B** (blue curves; shading shows 95% confidence intervals computed over 1000 shuffled datasets).  
511 Both in the experiments involving M1 and V1 (**Figure 6A**) and in those involving bilateral V1s, we  
512 find that the synchrony score is consistently higher than expected by chance ( $p < 0.001$ , z-test  
513 based on means of shuffled datasets). Despite this large deviation from the null hypothesis, state  
514 transitions do not typically occur at the same time in different cortical sites (mean synchrony score  
515  $\approx 0.35$  for both M1/V1 and bilateral V1 recordings). This implies that while state transitions  
516 observed across different cortical sites are not completely independent, coupling between  
517 channels is weak.

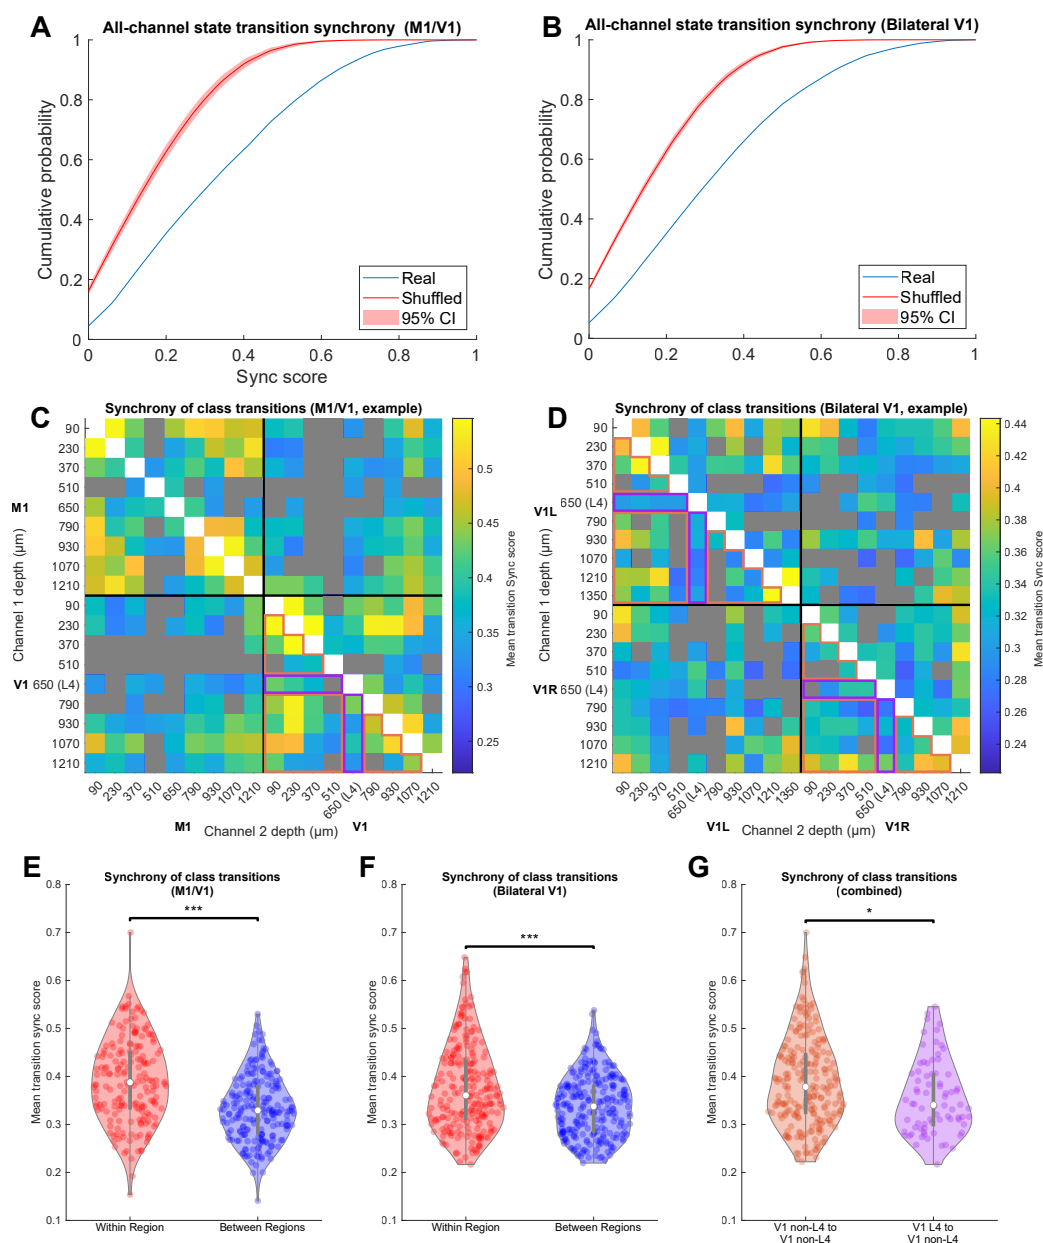

**Figure 6. Transition synchrony between channels in the same anatomical region is higher than between channels in different regions.** **A-B** The cumulative distribution of SPIKE-synchronization (synchrony) scores across all channels, in real recordings (blue) and the median  $\pm$  95% CI of 1000 shuffled recordings (red), for M1/V1 experiments (**A**) and bilateral V1 experiments (**B**). **C-D** Mean synchrony score across transitions for all channel pairs from a representative M1/V1 (**C**) and bilateral V1 (**D**) recording. Channel pairs whose synchrony scores were not significantly different from shuffled controls after Bonferroni correction are colored gray. **E-F** Channel pairs in which both channels are in the same region (red) have higher synchrony scores than those in which the channels are in different regions (blue) for M1/V1 (**E**,  $p = 1e-7$ , permutation test) and bilateral V1 (**F**,  $p = 2e-7$ , permutation test) recordings. **G**. Channel pairs in which one channel was within L4 and the other was not had lower synchrony scores than pairs in which neither channel was in L4 ( $p = 0.015$ , permutation test). Data included in these comparisons for the representative experiments are outlined in orange and purple, respectively, to highlight that only data from V1 electrodes were used.



519

520 Data in **Figure 6A-B** aggregate the transition synchrony scores calculated between all channel  
521 pairs—both pairs of channels in the same cortical region and those located in different cortical  
522 sites. We hypothesized that, because most cortical connectivity is local, nearby electrodes would  
523 tend to have a higher propensity to change state at the same time. **Figure 6C-F** shows that state  
524 transitions are indeed more synchronous between electrodes within a cortical region than  
525 between regions. **Figure 6C-D** shows synchrony scores between all channel pairs in a  
526 representative pair of experiments: an M1/V1 experiment (**Figure 6C**) and a bilateral V1  
527 experiment (**Figure 6D**). Pairs with scores that did not reach significance compared to the shuffled  
528 datasets, after Bonferroni correction for multiple comparisons, are shown in gray. Across all  
529 experiments, 57.0% of channel pairs from M1/V1 experiments and 80.2% of pairs from bilateral  
530 V1 experiments had significantly synchronous transitions at the corrected  $p < 0.05$  level. The  
531 synchronization scores for all channel pairs from all experiments are quantified in **Figure 6E-F**,  
532 for M1/V1 and bilateral V1 experiments respectively. Both panels show the synchrony scores for  
533 within-region channel pairs (red) and between-region channel pairs (blue). In both types of  
534 recordings, within-region pairs had significantly larger synchrony scores than between-region  
535 pairs ( $p = 1e-7$  for M1/V1 and  $p = 2e-7$  for bilateral V1, compared to  $10^7$  random permutations of  
536 the relevant channels (Methods)).

537

538 L4 is the thalamic input layer and has fewer horizontal connections than the supragranular or  
539 infragranular layers, which are rich in horizontal connections (Zilles and Palomero-Gallagher,  
540 2017). To test whether layer organization affects transition synchrony, from each V1 recording (in  
541 which L4 was identified using CSD), we separated channel pairs in which one channel was in L4  
542 from pairs in which neither channel was in L4. **Figure 6G** presents synchrony scores from all  
543 channel pairs from all experiments in which one channel was in L4 and the other was not (purple)  
544 and all channel pairs from all experiments in which neither channel was in L4 (orange). In **Figure**



545 **6E** and **F**, the specific channel pairs that were included in the “L4” and “non-L4” groups are  
546 outlined in purple and orange, respectively. We found that synchrony between channel pairs with  
547 one channel in L4 tended to be lower than between pairs in which neither channel was in L4 ( $p =$   
548 0.015, compared to  $10^7$  random permutations of the relevant channels (Methods)). Therefore,  
549 transition times in channels from L4 tend to be relatively uncoupled from the specific timing of  
550 transitions in channels from other layers. This observation suggests that it is unlikely that  
551 thalamocortical input is the principal driver of state transitions in the cortex. If it were, one would  
552 expect that the thalamic input layer (L4) would transition in synchrony with the rest of the cortex.  
553 Therefore, these results imply different mechanisms, such as cortico-cortical interactions, are  
554 likely responsible for the timing of these spatially localized transitions.

555

556 Our final analysis using synchrony scores was performed to build upon these L4 results and  
557 determine whether the type of subcortical input to a cortical region has an influence on transition  
558 synchrony. It is typically assumed that switches of the oscillatory activity in the cortical LFP  
559 critically involve interactions with the thalamus (Contreras and Steriade, 1997; Herrera et al.,  
560 2016; Liu et al., 2015; Schiff, 2008; Steriade et al., 1993a, 1994). In light of this, one may expect  
561 two regions receiving similar thalamic input to exhibit greater synchrony of state transitions than  
562 two regions that interact with the thalamus in different ways. Therefore, we tested whether  
563 between-region comparisons for the bilateral V1 experiments had higher synchrony scores than  
564 the between-region comparisons for the M1/V1 experiments. Contrary to our hypothesis, we were  
565 not able to detect any increase in synchrony scores calculated between the bilateral V1s relative  
566 to M1/V1 experiments ( $p = 0.35$ , percentile bootstrap over channels (Methods)).

567

### 568 **Discrete states in different cortical sites have weak correspondence.**

569 Until this point, our analysis was based on transition synchrony, a measure that is sensitive to the  
570 timing of transitions but not the identities of the states. In what follows, we shift our focus away

571 from the timing of state transitions and quantify the consistency of LFP-defined states at different  
572 sites. We accomplish this using normalized mutual information (MI), a measure of the amount of  
573 information obtained about one random variable by observing another random variable  
574 (Methods). In our case, these random variables are the time series of discrete states of two  
575 channels. High MI between these time series represents a large reduction in uncertainty about  
576 the state in channel  $j$  given the state in channel  $i$ . Two channels do not need to be in the same  
577 brain state to have high mutual information; indeed, since states are defined for each channel  
578 independently, there is no definition of different channels being in the “same” state. Rather, there  
579 must only be a consistent mapping from the states in one channel to those in the other. For  
580 example, if channel  $i$  is always in state A whenever channel  $j$  is in state D, one can predict the  
581 state of channel  $i$  from the state of channel  $j$ , and the MI between these channels would be high.  
582 As noted in the Methods, we normalized MI by the total entropy of the state distributions in the  
583 two channels over time in order to obtain a measure that was comparable across channels with  
584 different state distributions.

585

586 **Figure 7A-B** shows the normalized MI between all channel pairs in the same representative  
587 M1/V1 and bilateral V1 experiments as those in **Figure 6C-D**. 81.9% of channel pairs from M1/V1  
588 experiments and 96.9% of pairs from bilateral V1 experiments had normalized MI that was  
589 significantly higher than for shuffled data, after Bonferroni correction for multiple comparisons (z-  
590 test based on distribution of shuffled data). The summary of normalized MI across all animals is  
591 shown in **Figure 7C-D**, for M1/V1 and bilateral V1 experiments respectively. In both types of  
592 recordings, within-region channel pairs had significantly higher normalized MI than between-  
593 region pairs ( $p = 1e-7$  for M1/V1 and  $p = 1e-7$  for bilateral V1, compared to  $10^7$  random  
594 permutations of the relevant channels (Methods)). Note that, while for most channel pairs MI was  
595 higher than for a shuffled dataset, the amount of information about the state of one channel  
596 contained in the state of another was small. Normalized mutual information varies between 0 and

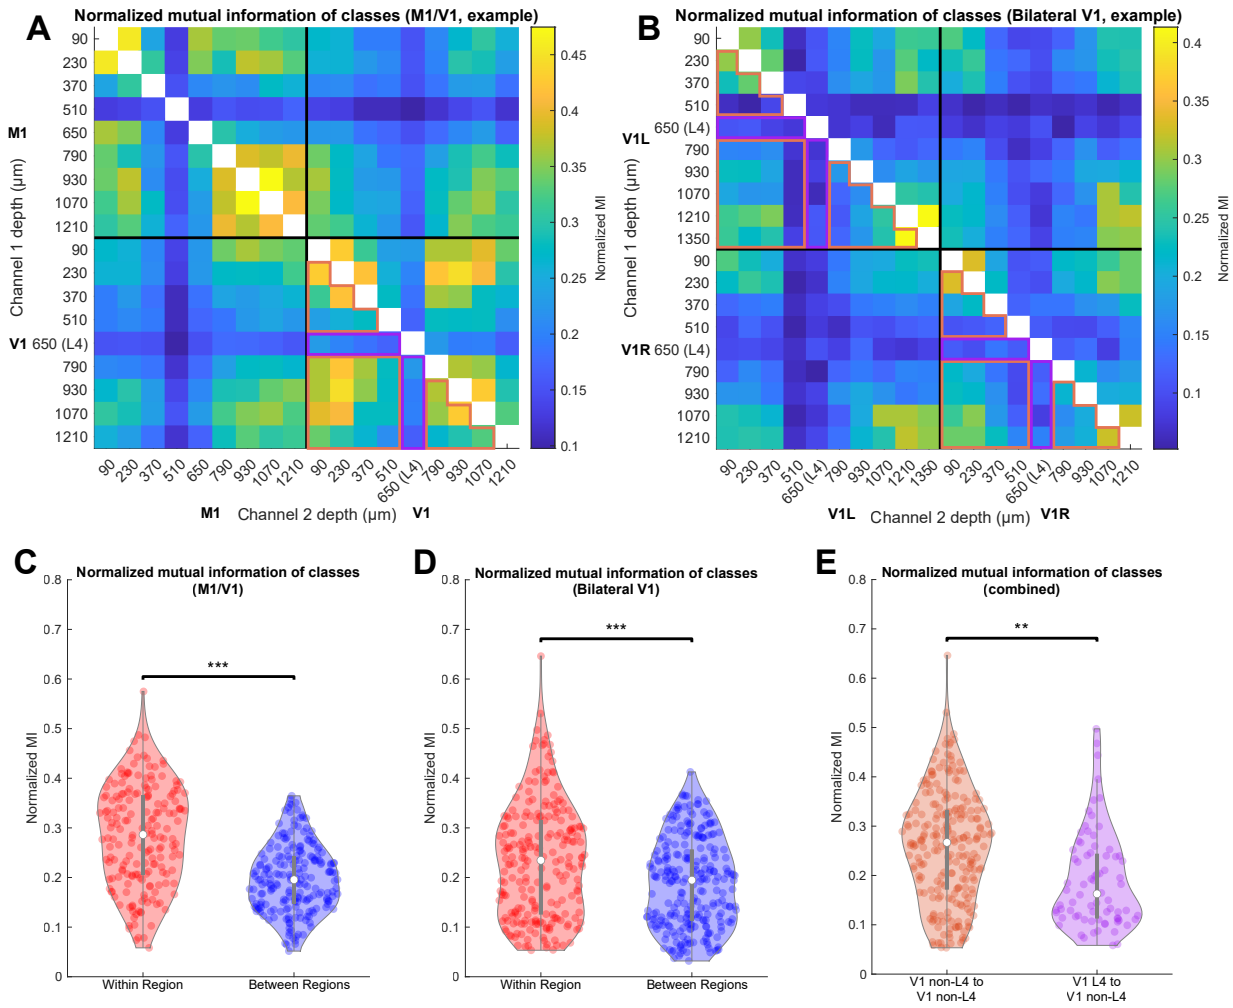

**Figure 7. Normalized mutual information (MI) between channels in the same anatomical region is higher than between channels in different regions.** **A-B** Normalized MI between state assignment vectors for all channel pairs from a representative M1/V1 (**A**) and bilateral V1 (**B**) recording. All normalized MI values are significantly different from shuffled controls after Bonferroni correction. **C-D** Channel pairs in which both channels are in the same region (red) have higher normalized MI than those in which the channels are in different regions (blue) for M1/V1 (**C**,  $p = 1e-7$ , permutation test) and bilateral V1 (**D**,  $p = 1e-7$ , permutation test) recordings. **E**. Channel pairs in which one channel was within L4 and the other was not had lower normalized MI than pairs in which neither channel was in L4 ( $p = 0.002$ , permutation test). Data included in these comparisons for the representative experiments are outlined in orange and purple, respectively, to highlight that only data from V1 electrodes were used.

597

598 1, where 1 denotes that the two channels carry identical information. Yet, even in a pair of  
 599 channels within a single cortical region, the mean MI is about 0.3. One way to interpret this statistic  
 600 (Methods) is that no more than 15% of the combined information carried by the states of any two

601 channels is redundant. Thus, most of the information about the state of one channel cannot be  
602 extracted from observing the state of a nearby channel in the cortex.

603

604 As with transition synchrony, we did not detect a higher mean normalized MI in left/right V1  
605 channel pairs compared to M1/V1 channel pairs ( $p = 0.70$ , percentile bootstrap over channels  
606 (Methods)). Additionally, as with the transition synchrony analysis, pairs including a channel in L4  
607 did have lower normalized MI than pairs where neither channel was in L4 ( $p = 0.002$ , compared  
608 to  $10^7$  random permutations of the relevant channels (Methods)). These results show not only that  
609 channels from the same brain region are more likely to undergo transitions at the same time, but  
610 also that the broader structure of these state assignments across the entire recording is more  
611 similar in channels from the same region. Furthermore, the conclusions regarding the differences  
612 between L4 and other cortical layers are consistent between synchrony and mutual information  
613 analyses.

614

615 **Full compressed spectrograms of different sites have moderate correspondence,**  
616 **depending on distance and cortical layer.**

617 In the previous analyses, to generate a single-value description of activity across time, we defined  
618 brain state as the NMF loading with the highest score in each time window. This method was  
619 convenient for comparing synchrony of transitions and mutual information of state sequences.

620 Parcellation of the LFP signals into discrete states is also supported by previous work (Hudson et  
621 al., 2014) However, reducing the LFP to a single value eliminates much of the information in the  
622 original signal. In order to incorporate more of this information, rather than collapsing the LFP  
623 signal to a single value, we used the vector of NMF scores for the LFP in each temporal window  
624 directly. Each score vector, once multiplied through by the appropriate loading matrix (Methods  
625 and **Figure 3**), yields a good approximation of the actual spectrum of the LFP in that time window.

626

627 To test for correlated fluctuations in the spectral features of LFPs at different cortical sites, we  
628 applied canonical correlation analysis (CCA) to the pair of score matrices derived from each pair  
629 of channels. High canonical correlation indicates a close linear relationship between two sets of  
630 variables. The mean of the vector  $\rho$  of canonical correlations between all pairs of canonical  
631 variables was calculated to give a measure of overall state similarity that is invariant to invertible  
632 linear transformations of each channel's state space. This method of taking the average across  $\rho$   
633 is explained further in Alpert and Peterson (1972). **Figure 8A-B** shows the CCA similarity measure  
634 for all channel pairs from the same representative M1/V1 and bilateral V1 experiments that have  
635 been shown previously. All channel pairs from both M1/V1 and bilateral V1 experiments had  
636 significantly higher CCA similarities than for shuffled data, after Bonferroni correction for multiple  
637 comparisons (z-test based on distribution of shuffled data). The summary of CCA similarity across  
638 all animals is shown in **Figure 8C-D**. These results are very similar to those for transition  
639 synchrony and normalized MI and show that in both types of recordings, within-region channel  
640 pairs had significantly higher CCA similarities than between-region pairs ( $p = 1e-7$  for M1/V1 and  
641  $p = 1e-7$  for bilateral V1, compared to  $10^7$  random permutations of the relevant channels  
642 (Methods)). Furthermore, as with the previous measures, channel pairs including a channel in L4  
643 had lower CCA similarities than pairs in which neither channel was in L4 ( $p = 0.001$ , compared to  
644  $10^7$  random permutations of the relevant channels (Methods)). We did not detect a higher mean  
645 CCA similarity in left/right V1 channel pairs compared to M1/V1 channel pairs ( $p = 0.12$ , percentile  
646 bootstrap over channels (Methods)).

647

#### 648 **Global brain state is low-dimensional, despite weak pairwise interactions.**

649 All results shown up until this point were calculated on pairs of channels for which state  
650 assignments were computed independently. What we have shown is that channels within the  
651 same cortical region tend to be more similar in their activity patterns and state transition times  
652 than channels from different cortical regions. However, close inspection of the results shows that,

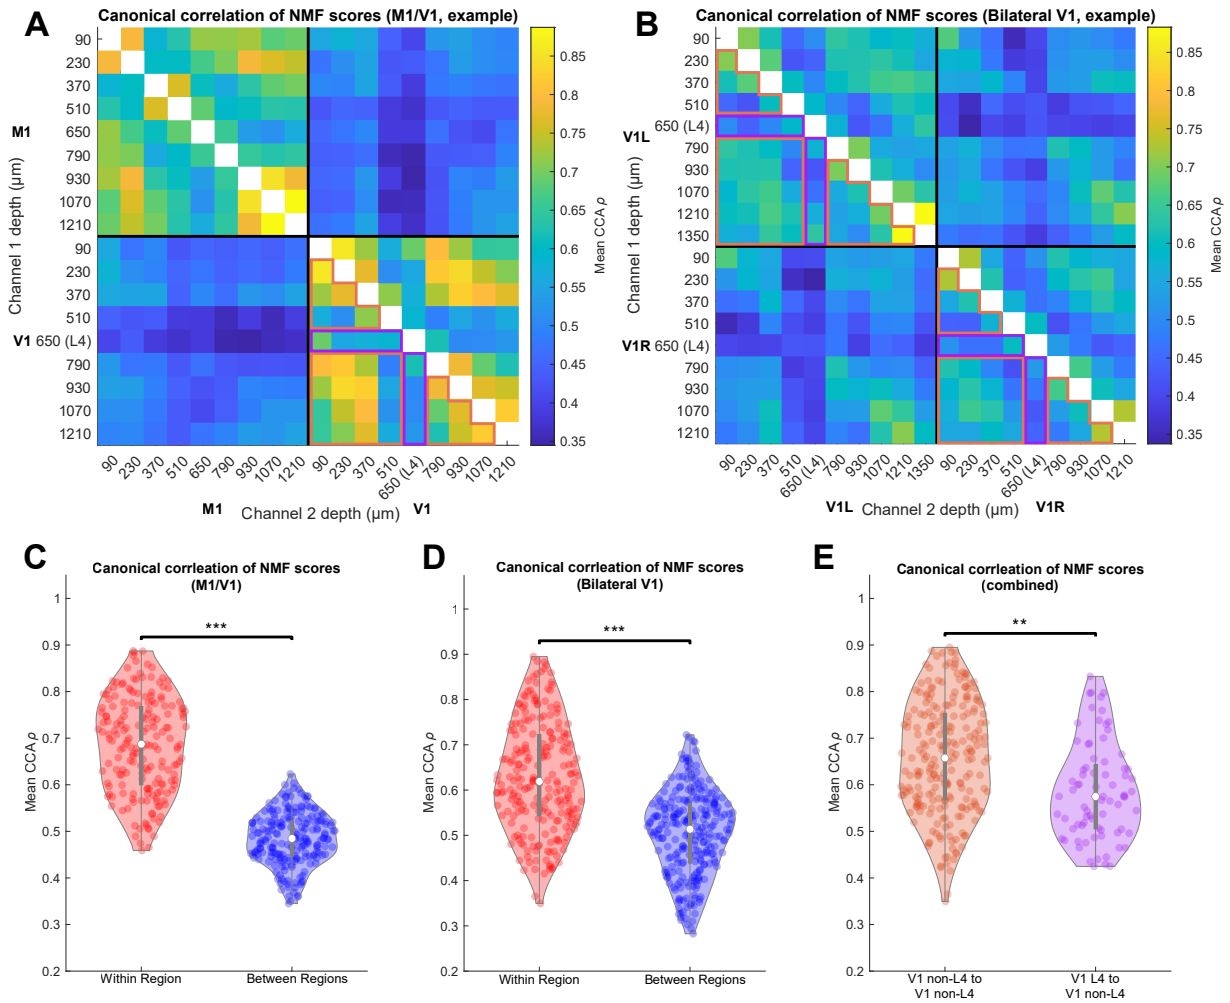

**Figure 8. Canonical correlation analysis (CCA) reveals higher correspondence of overall activity between channels in the same anatomical region than between channels in different regions. A-B** CCA measure on NMF scores for all channel pairs from representative M1/V1 (**A**) and bilateral V1 (**B**) recordings. **C-D** Channel pairs in which both channels are in the same region (red) have higher NMF score correspondence than those in which the channels are in different regions (blue) for M1/V1 (**C**,  $p = 1e-7$ , permutation test) and bilateral V1 (**D**,  $p = 1e-7$ , permutation test) recordings. **E**. Channel pairs in which one channel was within L4 and the other was not had lower NMF score correspondence than pairs in which neither channel was in L4 ( $p = 0.001$ , permutation test). Data included in these comparisons for the representative experiments are outlined in orange and purple, respectively, to highlight that only data from V1 electrodes were used.

653

654 even for the channel pairs within the same cortical region, only about one third of the information

655 contained within the discrete state sequences is shared between channels (**Figure 7C**). For

656 channel pairs from different cortical regions, the amount of mutual information in state sequences

657 is even lower. This weak coupling between channels could imply that spatially restricted regions  
658 of the brain act independently of one another and there is no discernable global state of the brain  
659 at any given time. Alternatively, it is possible that this weak coupling between channels, *en masse*,  
660 gives rise to a complex, global state of activity that is differently expressed in the oscillation  
661 patterns of spatially restricted regions of cortex. In this final analysis, we sought to directly  
662 distinguish these possibilities by characterizing the global brain state. In a key distinction from the  
663 previous work, rather than defining the global state on the basis of the concatenated spectra from  
664 all recordings, we attempted to identify global macroscopic dynamics from the simplified dynamics  
665 observed at each recording site. This was accomplished by first concatenating the NMF score  
666 vectors from all simultaneously recorded channels at each timepoint into a single vector that  
667 encodes the joint state of all channels. The resulting full matrix of joint states over time was then  
668 subjected to principal component analysis (PCA).

669  
670 We found that all but one recording required 10 or fewer components to account for 80% of the  
671 variance in the concatenated NMF score matrices, which ranged in dimensionality from 91 to 136.  
672 The recording that required greater than 10 required 15 components to reach the same threshold.  
673 This is far outside the 95% confidence interval of expected cumulative explained variance,  
674 computed on Markov-shuffled controls which ignore weak pairwise correlations between  
675 fluctuations in different channels (**Figure 9A, D**). These results demonstrate that widespread  
676 weak coupling is sufficient to give rise to a highly correlated global state. **Figures 9B** and **E** show  
677 the loadings onto channels and frequencies (mapped back from corresponding NMF loadings) for  
678 the top two principal components of a representative M1/V1 and bilateral V1 recording,  
679 respectively. These data offer qualitative evidence that the global state is differentially reflected  
680 in different regions and layers of the cortex. For example, the loadings of the second principal  
681 component (PC2) of the M1/V1 recording in **Figure 9B** show that, while there is high power in the  
682 higher frequencies for the V1 channels, the same is not true in the M1 channels. In contrast,



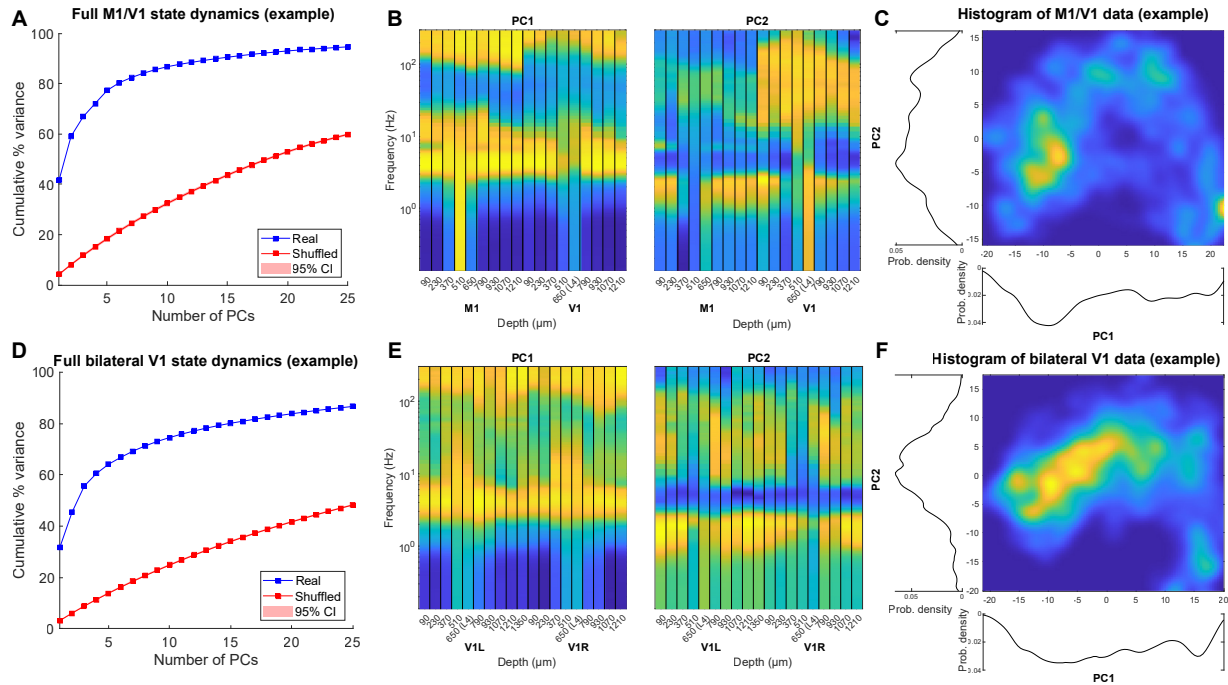

**Figure 9. Weakly correlated fluctuations in different cortical sites give rise to highly correlated cortical states.** NMF scores from all recorded channels were concatenated into a single state vector (median dimension across recordings = 106) and subjected to PCA. Fraction of total variance as a function of number of PCs is shown in **A** and **D** for M1/V1 and bilateral V1 example recordings respectively (blue). Shuffled surrogates (Methods) were subjected to the same analysis (red). **B** and **E** show loadings of the top 2 principal components, mapped back from each channel's NMF components to frequencies, for the two representative recordings. This projection reveals consistent differences between M1 and V1 (**B**) but is relatively consistent across bilateral V1s (**E**). In both instances, Layer 4 is distinct from supra- and infragranular layers. **C** and **F** show histograms of the data projected onto the top two PCs for the representative M1/V1 (**C**) and bilateral V1 (**F**) recordings. In both instances, the distribution of data is multimodal, suggesting the presence of discrete global cortical states.

683

684 **Figure 9E** shows that the loadings of PC1 of the bilateral V1 recording onto all channels of both  
 685 electrodes are fairly uniform, except for in channels near L4 where there is higher power in the  
 686 lowest frequency bands. **Figures 9C** and **F** show histograms of all samples from these  
 687 representative recordings projected onto the first two principal components. Although more than  
 688 two dimensions would be necessary to fully visualize the landscape of the global dynamics, even  
 689 in this limited projection, a clustered pattern is visible, similar to previous results (Hudson et al.,  
 690 2014). These data suggest that global brain states comprise regionally distinct oscillation patterns  
 691 that are weakly coupled with one another. Remarkably, these results show that discrete



692 transitions between global cortical states (Ballesteros et al., 2020; Hudson et al., 2014; Patel et  
693 al., 2020) under a fixed anesthetic concentration arise from the multitude of weakly coupled local  
694 fluctuations.  
695

696 **Discussion:**

697 Here we set out to determine how abrupt transitions between global thalamocortical states arise  
698 at a fixed anesthetic concentration. Using several complementary analysis methods, we  
699 demonstrate that correlated fluctuations in the oscillatory behavior observed at different cortical  
700 sites are widespread, but that each pairwise interaction is weak. Thus, for instance, the ability to  
701 infer the current state of one channel by observing the state of a nearby channel in the cortex is  
702 limited. Remarkably, we provide evidence that abrupt transitions between discrete macroscopic  
703 cortical activity patterns (Ballesteros et al., 2020; Chander et al., 2014; Hudson et al., 2014;  
704 Ishizawa et al., 2016; Lee et al., 2020; Patel et al., 2020) emerge naturally from the multitude of  
705 these quasi-independent local fluctuations. We also demonstrate that the strength of the  
706 interactions between recording sites depends on the inter-electrode distance and on the cortical  
707 layer. Specifically, we find that fluctuations in L4, the thalamic input layer, tend to be less  
708 congruent with those in other layers. Altogether, these results argue that abrupt global state  
709 transitions are not imposed on the thalamocortical networks by changes in the activity of broadly  
710 projecting modulatory arousal systems, but rather are strongly influenced by the local cortico-  
711 cortical interactions.

712

713 It has been conjectured that structured transitions between discrete states constrain the space of  
714 possible brain activity patterns and thereby allow the brain to efficiently recover its normal waking  
715 state after a dramatic perturbation (Hudson et al., 2014). The idea that, in order to recover from a  
716 perturbation, the space of possible activity states must be constrained by stabilization of a few  
717 discrete activity patterns is not specific to recovery from anesthesia *per se*. For instance,  
718 pharmacologically provoked recovery of consciousness in the setting of brain injury is also  
719 characterized by abrupt transitions between quasi-stable activity patterns (Victor et al., 2011).  
720 Sleep is also well known to consist of discrete activity patterns (e.g., Gervasoni et al., 2004). Thus,

721 it appears that abrupt state transitions among discrete activity states accompany recovery of  
722 normal consciousness in a variety of settings.

723

724 It is thus of great interest to determine how such state transitions arise and how they are  
725 coordinated across thalamocortical networks. Here, in keeping with previous work (e.g.,  
726 Gervasoni, 2004; Hudson et al., 2014), we defined the state of each local recording site on the  
727 basis of the power spectrum of the LFP. Since we focused on state transitions observed in the  
728 anesthetized brain, most fluctuations occurred in the slow oscillations ( $< 1$  Hz) (Steriade et al.,  
729 1993b), delta oscillations (1-4 Hz), and the spindle range of 8-14 Hz (Purpura, 1968). Multiple  
730 distinct neurophysiological mechanisms contribute to the generation and coordination of the  
731 various brain oscillations observed in the anesthetized brain. Slow oscillations, for instance are  
732 thought to be primarily generated through local synaptic mechanisms in the cortex (Sanchez-  
733 Vives and McCormick, 2000; Steriade et al., 1993b). Thalamocortical and thalamic reticular  
734 neurons reflect these slow oscillations and are phase locked to them (Steriade et al., 1993b).  
735 However, the fact that slow oscillations are abolished in the thalamus of decorticated animals  
736 (Timofeev and Steriade, 1996) but are observed in the cortex of athalamic animals (Steriade et  
737 al., 1993b) strongly argues for the cortical origin of slow oscillations. Cortico-cortical interactions  
738 are thought to underlie not just the generation of slow waves, but also the synchronization of these  
739 waves across the cortex. Pharmacologic and surgical lesions of intra-cortical connections disrupt  
740 the synchrony of slow waves (Amzica and Steriade, 1995).

741

742 The observation that slow oscillations are coordinated primarily through cortico-cortical  
743 interactions is consistent with our results. Many of the state transitions under isoflurane involve  
744 fluctuations in the power of slow oscillations. Using three distinct analysis methods, we  
745 consistently find that state fluctuations in L4 are relatively dissimilar to those observed in the infra-  
746 and supragranular layers. L4 neurons are most directly affected by spatially localized inputs from

747 the thalamus, whereas supra- and infra-granular neurons are primarily driven by cortico-cortical  
748 connections and matrix projections from the thalamus (Jones, 2001). While anesthetics suppress  
749 both core and matrix thalamocortical inputs, their dominant effect is specifically suppressing  
750 cortico-cortical connectivity (Raz et al., 2014). It is thus likely that the local nature of state  
751 transitions in the slow oscillation range is a consequence of both weakened thalamocortical and  
752 cortico-cortical interactions in the anesthetized brain.

753

754 Transitions between slow (< 4Hz) and faster EEG oscillations, occasionally observed even in the  
755 anesthetized brain (e.g., **Figure 2**) are thought to arise as a result of the interaction of the thalamo-  
756 cortical networks with neuromodulatory projections from cholinergic neurons in the brainstem and  
757 basal forebrain (Steriade, 2004). Noradrenergic neurons (Vazey and Aston-Jones, 2014) and  
758 other brain stem and basal forebrain nuclei also contribute to the modulation of the oscillations  
759 exhibited by the thalamocortical networks (Jones, 2003). Activity within the various arousal  
760 promoting nuclei is coordinated by a group of medullary neurons, activation of which can trigger  
761 prompt awakening from deep states of anesthesia (Gao et al., 2019). In the anesthetized brain,  
762 fluctuations in the firing rate of these medullary neurons co-varies with the fluctuations in the  
763 spectral characteristics of the cortical LFP (Gao et al., 2019). Thus, it is possible that the  
764 spontaneous fluctuations of the LFP characteristics between the slower and faster oscillations are  
765 in part mediated by fluctuations in the activity of the nuclei that modulate the thalamocortical  
766 networks. However, most arousal nuclei have broad projections to the thalamus and the cortex  
767 (Jones, 2003). Thus, if the fluctuations in the state of the LFP were entirely driven by the  
768 fluctuations in the activity of the modulatory projections, one would expect that the state of the  
769 LFP would fluctuate coherently across the cortex. Instead, we observe that fluctuations in state  
770 of the LFP are only weakly coupled between different cortical sites. This implies that the influence  
771 of the modulatory nuclei on the power of specific cortical oscillations, within the physiological  
772 range, is not absolute. Rather, activation of the modulatory systems likely biases the cortex

773 towards a particular oscillatory state. The overall pattern of activity at each cortical site, however,  
774 is strongly influenced by interactions within the thalamocortical networks.

775

776 The experiments performed here cannot directly address the cellular and synaptic mechanisms  
777 that give rise to local state transitions and their coordination across the cortex. They do, however,  
778 offer clear insights into network mechanisms of global state transitions. Here, rather than  
779 attempting to simplify the dynamics of the global signals directly (Hudson et al., 2014), we  
780 embedded the dynamics of the local signals into a low-dimensional space. This analysis revealed  
781 only weak interactions between local signals. Remarkably, assembling just the low-dimensional  
782 projections of the local signals into a state vector recapitulated the low-dimensional dynamics and  
783 discrete global cortical states. Thus, we show that the global states and abrupt transitions  
784 between them arise because of weak coupling between local state fluctuations.

785

786 We are not the first to note that weak coupling among local fluctuations can give rise to coherent  
787 macroscopic states. In the retina, weak correlations in spike timing co-exist with a conspicuously  
788 high probability of certain large ensembles of neurons firing in synchrony (Schneidman et al.,  
789 2006). It may seem that a network with weakly correlated nodes can be well approximated by a  
790 collection of completely independent nodes, but this is not the case. Weakly coupled elements  
791 can yield highly correlated macroscopic states if the weak interactions are prevalent enough  
792 throughout the network. Indeed, we find that while the correlations between different cortical sites  
793 were weak, they were present and statistically significant for most electrode pairs.

794

795 The emergence of highly correlated global states from weak pairwise interactions has been  
796 investigated extensively in statistical mechanics using Ising models. It has been shown that an  
797 Ising model is mathematically equivalent to a maximum entropy models of the statistics of neural  
798 firing that are constrained only by the experimentally observed firing probabilities of individual

799 neurons and their pairwise correlations (Schneidman et al., 2006; Tkačik et al., 2006). The  
800 maximum entropy approach has proved successful in diverse systems (Ohiorhenuan et al., 2010;  
801 Tang et al., 2008; Tkačik et al., 2014; Yu et al., 2008). Although Ising models have traditionally  
802 been applied to binary state spaces, such as the presence or absence of an action potential within  
803 a small time window, the maximum entropy approach can be generalized to continuous variables  
804 (Bialek et al., 2012), such as local fields. In this work, we did not explicitly attempt to construct a  
805 maximum entropy model of local field fluctuations, as we are recording only a tiny fraction of all  
806 cortical signals. Future work may sample of local field fluctuations more densely to determine  
807 whether an Ising-type model suffices to explain the fluctuations of the global state of the brain  
808 under anesthesia, or whether other mechanisms in addition to pairwise interactions are needed  
809 (Ohiorhenuan et al., 2010; Tang et al., 2008). Regardless of the specific details of such a model,  
810 however, we directly demonstrate that widespread weak correlations in local field fluctuations give  
811 rise to coherent global cortical states. This conclusion is strongly supported by the observations  
812 that locally defined cortical states yield highly correlated global behavior despite weak pairwise  
813 interactions, whereas the shuffled controls do not.

814

815 There are multiple parallels between our characterization of state transitions in the anesthetized  
816 brain and those observed during slow wave sleep (NREM). While sleep and anesthesia are clearly  
817 distinct phenomena, the neurophysiological mechanisms that give rise to oscillations in the  
818 thalamocortical circuitry under anesthesia and during natural sleep share some essential  
819 similarities (Steriade et al., 1993b; Steriade and Amzica, 1998). Many diverse anesthetics  
820 promote activity in the sleep active subcortical nuclei and suppress activity in the wake active  
821 ones (Jiang-Xie et al., 2019; Moore et al., 2012; Nelson et al., 2002; Zhang et al., 2015).  
822 Furthermore, both sleep and anesthesia consist of several discrete states, each characterized by  
823 a distinct pattern of oscillations in the cortex and thalamus (Saper et al., 2010). Based on the  
824 original recordings at the microscopic level of single isolated neurons or, alternatively, on the

825 macroscopic level using EEG, it has long been hypothesized that sleep stages are brain-wide  
826 phenomena and that the neurophysiological mechanisms that give rise to sleep stage switching  
827 specifically prevent multiple sleep stages or sleep and wakefulness from coexisting at the same  
828 time in different brain regions (Lu et al., 2006; Saper et al., 2010). Interestingly, at the mesoscopic  
829 level of neuronal populations and local fields, sleep state transitions, much like in this work, can  
830 be local (Nir et al., 2011; Poulet and Petersen, 2008; Vyazovskiy et al., 2011). Furthermore, it  
831 has been suggested that antecedent neuronal activity driven by a specific task can increase the  
832 propensity of a population of cortical neurons to exhibit local sleep-like slow oscillations (Huber et  
833 al., 2004), implying that transitions between different oscillatory modes are strongly influenced by  
834 local synaptic interactions. The degree of synchrony between cortical locations across naturally  
835 observed state transitions, such as those between different sleep stages or between sleep and  
836 wake, has not been directly quantified in a systematic fashion. Because sleep is strongly  
837 influenced by both homeostatic and circadian influences, it will be challenging to disentangle  
838 these global influences from the local interactions between different sites in the cortex. However,  
839 analysis of cortical state transitions in the brain anesthetized with a fixed anesthetic concentration  
840 is free from these complications. This analysis shows that the apparently global coordinated shifts  
841 in cortical activity arise naturally out of weakly interacting local state switches.

842

## 843 **Data and Software Availability**

844 Datasets are available upon reasonable request. Code for time-frequency analysis of LFP and  
845 interaction measure calculation is publicly available at [https://github.com/ProektLab/spec-state-](https://github.com/ProektLab/spec-state-trans)  
846 [trans](#) and other public repositories linked from the README.

847

## 848 **Acknowledgements**

849 The authors thank Andrew Hudson for his implementation of the multitaper method, as well as  
850 Adeeti Aggarwal, Max Kelz, Andrew McKinstry-Wu, and Andi Wasilczuk for helpful conversations.  
851 This work was supported by National Institutes of Health R01 grants no. 5R01GM124023 and  
852 5R01NS113366. B.P.S. was also supported by an NIH National Research Service Award (F31)  
853 (grant no. 1F31NS118808-01A1).

854

## 855 **Competing Interests**

856 The authors declare that they have no competing interests.

857

858

## 859 **Works Cited**

- 860 Alpert MI, Peterson RA. 1972. On the Interpretation of Canonical Analysis. *Journal of Marketing*  
861 *Research* **9**:7.
- 862 Amzica F. 2009. Basic physiology of burst-suppression. *Epilepsia* **50**:38–39. doi:10.1111/j.1528-  
863 1167.2009.02345.x
- 864 Amzica F, Steriade M. 1995. Disconnection of intracortical synaptic linkages disrupts  
865 synchronization of a slow oscillation. *J Neurosci* **15**:4658–4677.  
866 doi:10.1523/JNEUROSCI.15-06-04658.1995
- 867 Ballesteros JJ, Briscoe JB, Ishizawa Y. 2020. Neural signatures of  $\alpha$ 2-Adrenergic agonist-  
868 induced unconsciousness and awakening by antagonist. *eLife* **9**:e57670.  
869 doi:10.7554/eLife.57670
- 870 Bialek W, Cavagna A, Giardina I, Mora T, Silvestri E, Viale M, Walczak AM. 2012. Statistical  
871 mechanics for natural flocks of birds. *PNAS* **109**:4786–4791.  
872 doi:10.1073/pnas.1118633109
- 873 Brown EN, Lydic R, Schiff ND. 2010. General Anesthesia, Sleep, and Coma. *New England*  
874 *Journal of Medicine* **363**:2638–2650. doi:10.1056/NEJMra0808281



- 875 Canavier CC, Baxter DA, Clark JW, Byrne JH. 1993. Nonlinear dynamics in a model neuron  
876 provide a novel mechanism for transient synaptic inputs to produce long-term alterations  
877 of postsynaptic activity. *J Neurophysiol* **69**:2252–2257. doi:10.1152/jn.1993.69.6.2252
- 878 Chander D, García PS, MacColl JN, Illing S, Sleight JW. 2014. Electroencephalographic  
879 Variation during End Maintenance and Emergence from Surgical Anesthesia. *PLoS ONE*  
880 **9**:e106291. doi:10.1371/journal.pone.0106291
- 881 Civillico EF, Contreras D. 2012. Spatiotemporal properties of sensory responses in vivo are  
882 strongly dependent on network context. *Frontiers in Systems Neuroscience* **6**:1–20.  
883 doi:10.3389/fnsys.2012.00025
- 884 Contreras D, Steriade M. 1997. State-dependent fluctuations of low-frequency rhythms in  
885 corticothalamic networks. *Neuroscience* **76**:25–38. doi:10.1016/s0306-4522(96)00392-2
- 886 Destexhe A, Contreras D, Sejnowski TJ, Steriade M. 1994. Modeling the control of reticular  
887 thalamic oscillations by neuromodulators. *Neuroreport* **5**:2217–2220.  
888 doi:10.1097/00001756-199411000-00003
- 889 Einevoll GT, Kayser C, Logothetis NK, Panzeri S. 2013. Modelling and analysis of local field  
890 potentials for studying the function of cortical circuits. *Nature Reviews Neuroscience*  
891 **14**:770–785.
- 892 Ermentrout B. 1998. Neural networks as spatio-temporal pattern-forming systems. *Rep Prog*  
893 *Phys* **61**:353–430. doi:10.1088/0034-4885/61/4/002
- 894 Fisher RS, Engel JJ. 2010. Definition of the postictal state: When does it start and end?  
895 *Epilepsy & Behavior* **19**:100–104. doi:10.1016/j.yebeh.2010.06.038
- 896 Friedman EB, Sun Y, Moore JT, Hung H-T, Meng QC, Perera P, Joiner WJ, Thomas SA,  
897 Eckenhoff RG, Sehgal A, Kelz MB. 2010. A Conserved Behavioral State Barrier Impedes  
898 Transitions between Anesthetic-Induced Unconsciousness and Wakefulness: Evidence  
899 for Neural Inertia. *PLoS One* **5**:e11903. doi:10.1371/journal.pone.0011903
- 900 Gao S, Proekt A, Renier N, Calderon DP, Pfaff DW. 2019. Activating an anterior nucleus  
901 gigantocellularis subpopulation triggers emergence from pharmacologically-induced  
902 coma in rodents. *Nat Commun* **10**:2897. doi:10.1038/s41467-019-10797-7
- 903 Gervasoni D, Lin S-C, Ribeiro S, Soares ES, Pantoja J, Nicolelis MAL. 2004. Global Forebrain  
904 Dynamics Predict Rat Behavioral States and Their Transitions. *J Neurosci* **24**:11137–  
905 11147. doi:10.1523/JNEUROSCI.3524-04.2004
- 906 Herrera CG, Cadavieco MC, Jago S, Ponomarenko A, Korotkova T, Adamantidis A. 2016.  
907 Hypothalamic feedforward inhibition of thalamocortical network controls arousal and  
908 consciousness. *Nature Neuroscience* **19**:290–298. doi:10.1038/nn.4209
- 909 Hodgkin AL, Huxley AF. 1952. A quantitative description of membrane current and its  
910 application to conduction and excitation in nerve. *J Physiol* **117**:500–544.
- 911 Huber R, Felice Ghilardi M, Massimini M, Tononi G. 2004. Local sleep and learning. *Nature*  
912 **430**:78–81. doi:10.1038/nature02663
- 913 Hudson AE, Calderon DP, Pfaff DW, Proekt A. 2014. Recovery of consciousness is mediated by  
914 a network of discrete metastable activity states. *Proceedings of the National Academy of*  
915 *Sciences* **111**:9283–9288. doi:10.1073/pnas.1408296111
- 916 Ishizawa Y, Ahmed OJ, Patel SR, Gale JT, Sierra-Mercado D, Brown EN, Eskandar EN. 2016.  
917 Dynamics of Propofol-Induced Loss of Consciousness Across Primate Neocortex.  
918 *Journal of Neuroscience* **36**:7718–7726. doi:10.1523/JNEUROSCI.4577-15.2016
- 919 Izhikevich EM. 2007. Dynamical systems in neuroscience: the geometry of excitability and  
920 bursting, Computational neuroscience. Cambridge, Mass: MIT Press.
- 921 Jiang-Xie L-F, Yin L, Zhao S, Prevosto V, Han B-X, Dzirasa K, Wang F. 2019. A Common  
922 Neuroendocrine Substrate for Diverse General Anesthetics and Sleep. *Neuron*  
923 **102**:1053-1065.e4. doi:10.1016/j.neuron.2019.03.033

- 924 Joiner WJ, Friedman EB, Hung H-T, Koh K, Sowcik M, Sehgal A, Kelz MB. 2013. Genetic and  
925 Anatomical Basis of the Barrier Separating Wakefulness and Anesthetic-Induced  
926 Unresponsiveness. *PLoS Genet* **9**:e1003605. doi:10.1371/journal.pgen.1003605  
927 Jones BE. 2003. Arousal systems. *Front Biosci* **8**:s438-451. doi:10.2741/1074  
928 Jones EG. 2001. The thalamic matrix and thalamocortical synchrony. *Trends Neurosci* **24**:595–  
929 601. doi:10.1016/s0166-2236(00)01922-6  
930 Kelz MB, Sun Y, Chen J, Cheng Meng Q, Moore JT, Veasey SC, Dixon S, Thornton M, Funato  
931 H, Yanagisawa M. 2008. An essential role for orexins in emergence from general  
932 anesthesia. *Proc Natl Acad Sci U S A* **105**:1309–1314. doi:10.1073/pnas.0707146105  
933 Kreuz T, Bozanic N, Mulansky M. 2015. SPIKE-Synchronization: a parameter-free and time-  
934 resolved coincidence detector with an intuitive multivariate extension. *BMC Neurosci*  
935 **16**:P170, 1471-2202-16-S1-P170. doi:10.1186/1471-2202-16-S1-P170  
936 Lee DD, Seung HS. 1999. Learning the parts of objects by non-negative matrix factorization.  
937 *Nature* **401**:788–791. doi:10.1038/44565  
938 Lee H, Wang S, Hudetz AG. 2020. State-Dependent Cortical Unit Activity Reflects Dynamic  
939 Brain State Transitions in Anesthesia. *J Neurosci* **40**:9440–9454.  
940 doi:10.1523/JNEUROSCI.0601-20.2020  
941 Liu J, Lee HJ, Weitz AJ, Fang Z, Lin P, Choy M, Fisher R, Pinskiy V, Tolpygo A, Mitra P, Schiff  
942 N, Lee JH. 2015. Frequency-selective control of cortical and subcortical networks by  
943 central thalamus. *eLife* **4**:1–27. doi:10.7554/eLife.09215.001  
944 Lu J, Sherman D, Devor M, Saper CB. 2006. A putative flip–flop switch for control of REM  
945 sleep. *Nature* **441**:589–594. doi:10.1038/nature04767  
946 Mankad S, Michailidis G. 2013. Structural and functional discovery in dynamic networks with  
947 non-negative matrix factorization. *Phys Rev E* **88**:042812.  
948 doi:10.1103/PhysRevE.88.042812  
949 Moore JT, Chen J, Han B, Meng QC, Veasey SC, Beck SG, Kelz MB. 2012. Direct Activation of  
950 Sleep-Promoting VLPO Neurons by Volatile Anesthetics Contributes to Anesthetic  
951 Hypnosis. *Current Biology* **22**:2008–2016. doi:10.1016/j.cub.2012.08.042  
952 Moruzzi G, Magoun HW. 1949. Brain stem reticular formation and activation of the EEG.  
953 *Electroencephalography and Clinical Neurophysiology* **1**:455–473. doi:10.1016/0013-  
954 4694(49)90219-9  
955 Nelson LE, Guo TZ, Lu J, Saper CB, Franks NP, Maze M. 2002. The sedative component of  
956 anesthesia is mediated by GABAA receptors in an endogenous sleep pathway. *Nat*  
957 *Neurosci* **5**:979–984. doi:10.1038/nn913  
958 Nir Y, Staba RJ, Andrillon T, Vyazovskiy VV, Cirelli C, Fried I, Tononi G. 2011. Regional Slow  
959 Waves and Spindles in Human Sleep. *Neuron* **70**:153–169.  
960 doi:10.1016/j.neuron.2011.02.043  
961 Ohiorhenuan IE, Mechler F, Purpura KP, Schmid AM, Hu Q, Victor JD. 2010. Sparse coding  
962 and high-order correlations in fine-scale cortical networks. *Nature* **466**:617–621.  
963 doi:10.1038/nature09178  
964 Owen AB, Perry PO. 2009. Bi-cross-validation of the SVD and the nonnegative matrix  
965 factorization. *Ann Appl Stat* **3**. doi:10.1214/08-AOAS227  
966 Pan B, Zucker RS. 2009. A General Model of Synaptic Transmission and Short-Term Plasticity.  
967 *Neuron* **62**:539–554. doi:10.1016/j.neuron.2009.03.025  
968 Patel SR, Ballesteros JJ, Ahmed OJ, Huang P, Briscoe J, Eskandar EN, Ishizawa Y. 2020.  
969 Dynamics of recovery from anaesthesia-induced unconsciousness across primate  
970 neocortex. *Brain* **143**:833–843. doi:10.1093/brain/awaa017  
971 Poulet JFA, Petersen CCH. 2008. Internal brain state regulates membrane potential synchrony  
972 in barrel cortex of behaving mice. *Nature* **454**:881–885. doi:10.1038/nature07150  
973 Purpura DP. 1968. Role of synaptic inhibition in synchronization of thalamocortical activity. *Prog*  
974 *Brain Res* **22**:107–122. doi:10.1016/s0079-6123(08)63499-8

- 975 Quairiaux C, Megevand P, Kiss JZ, Michel CM. 2011. Functional Development of Large-Scale  
976 Sensorimotor Cortical Networks in the Brain. *Journal of Neuroscience* **31**:9574–9584.  
977 doi:10.1523/JNEUROSCI.5995-10.2011
- 978 Raz A, Grady SM, Krause BM, Uhrich DJ, Manning KA, Banks MI. 2014. Preferential effect of  
979 isoflurane on top-down vs. bottom-up pathways in sensory cortex. *Frontiers in Systems*  
980 *Neuroscience* **8**:191. doi:10.3389/fnsys.2014.00191
- 981 Reitz SL, Wasilczuk AZ, Beh GH, Proekt A, Kelz MB. 2021. Activation of Preoptic Tachykinin 1  
982 Neurons Promotes Wakefulness over Sleep and Volatile Anesthetic-Induced  
983 Unconsciousness. *Current Biology* **31**:394-405.e4. doi:10.1016/j.cub.2020.10.050
- 984 Saczynski JS, Marcantonio ER, Quach L, Fong TG, Gross A, Inouye SK, Jones RN. 2012.  
985 Cognitive Trajectories after Postoperative Delirium. *New England Journal of Medicine*  
986 **367**:30–39. doi:10.1056/NEJMoa1112923
- 987 Sanchez-Vives MV, McCormick DA. 2000. Cellular and network mechanisms of rhythmic  
988 recurrent activity in neocortex. *Nature Neuroscience* **3**:1027–1034. doi:10.1038/79848
- 989 Saper CB, Fuller PM, Pedersen NP, Lu J, Scammell TE. 2010. Sleep State Switching. *Neuron*  
990 **68**:1023–1042. doi:10.1016/j.neuron.2010.11.032
- 991 Schiff ND. 2008. Central thalamic contributions to arousal regulation and neurological disorders  
992 of consciousness. *Annals of the New York Academy of Sciences* **1129**:105–118.  
993 doi:10.1196/annals.1417.029
- 994 Schneidman E, Berry MJ, Segev R, Bialek W. 2006. Weak pairwise correlations imply strongly  
995 correlated network states in a neural population. *Nature* **440**:1007–1012.  
996 doi:10.1038/nature04701
- 997 Self MW, Kerkoerle T van, Supèr H, Roelfsema PR. 2013. Distinct roles of the cortical layers of  
998 area V1 in figure-ground segregation. *Current biology* **23**:2121–2129.  
999 doi:10.1016/j.cub.2013.09.013
- 1000 Stecker MM, Cheung AT, Pochettino A, Kent GP, Patterson T, Weiss SJ, Bavaria JE. 2001.  
1001 Deep hypothermic circulatory arrest: I. Effects of cooling on electroencephalogram and  
1002 evoked potentials. *The Annals of Thoracic Surgery* **71**:14–21. doi:10.1016/S0003-  
1003 4975(00)01592-7
- 1004 Steriade M. 2004. Acetylcholine systems and rhythmic activities during the waking--sleep cycle.  
1005 *Prog Brain Res* **145**:179–196. doi:10.1016/S0079-6123(03)45013-9
- 1006 Steriade M, Amzica F. 1998. Slow sleep oscillation, rhythmic K-complexes, and their  
1007 paroxysmal developments. *Journal of Sleep Research* **7**:30–35. doi:10.1046/j.1365-  
1008 2869.7.s1.4.x
- 1009 Steriade M, Amzica F, Contreras D. 1994. Cortical and thalamic cellular correlates of  
1010 electroencephalographic burst-suppression. *Electroencephalography and Clinical*  
1011 *Neurophysiology* **90**:1–16. doi:10.1016/0013-4694(94)90108-2
- 1012 Steriade M, McCormick DA, Sejnowski TJ. 1993a. Thalamocortical Oscillations in the Sleeping  
1013 and Aroused Brain. *Science* **262**:679–685.
- 1014 Steriade M, Nunez A, Amzica F. 1993b. A novel slow (< 1 Hz) oscillation of neocortical neurons  
1015 in vivo: depolarizing and hyperpolarizing components. *J Neurosci* **13**:3252–3265.  
1016 doi:10.1523/JNEUROSCI.13-08-03252.1993
- 1017 Strogatz SH. 2015. *Bifurcations Nonlinear Dynamics and Chaos: With Applications to Physics,*  
1018 *Biology, Chemistry, and Engineering.* Boca Raton: CRC Press. pp. 45–94.
- 1019 Tang A, Jackson D, Hobbs J, Chen W, Smith JL, Patel H, Prieto A, Petrusca D, Grivich MI, Sher  
1020 A, Hottowy P, Dabrowski W, Litke AM, Beggs JM. 2008. A Maximum Entropy Model  
1021 Applied to Spatial and Temporal Correlations from Cortical Networks In Vitro. *J Neurosci*  
1022 **28**:505–518. doi:10.1523/JNEUROSCI.3359-07.2008
- 1023 Timofeev I, Grenier F, Steriade M. 2004. Contribution of Intrinsic Neuronal Factors in the  
1024 Generation of Cortically Driven Electrographic Seizures. *Journal of Neurophysiology*  
1025 **92**:1133–1143. doi:10.1152/jn.00523.2003

- 1026 Timofeev I, Steriade M. 1996. Low-frequency rhythms in the thalamus of intact-cortex and  
1027 decorticated cats. *J Neurophysiol* **76**:4152–4168. doi:10.1152/jn.1996.76.6.4152
- 1028 Tkačik G, Marre O, Amodei D, Schneidman E, Bialek W, li MJB. 2014. Searching for Collective  
1029 Behavior in a Large Network of Sensory Neurons. *PLoS Computational Biology*  
1030 **10**:e1003408. doi:10.1371/journal.pcbi.1003408
- 1031 Tkačik G, Schneidman E, Berry II MJ, Bialek W. 2006. Ising models for networks of real  
1032 neurons. *arXiv:q-bio/0611072*.
- 1033 Vazey EM, Aston-Jones G. 2014. Designer receptor manipulations reveal a role of the locus  
1034 coeruleus noradrenergic system in isoflurane general anesthesia. *Proc Natl Acad Sci U*  
1035 *S A* **111**:3859–3864. doi:10.1073/pnas.1310025111
- 1036 Victor JD, Drover JD, Conte MM, Schiff ND. 2011. Mean-field modeling of thalamocortical  
1037 dynamics and a model-driven approach to EEG analysis. *PNAS* **108**:15631–15638.  
1038 doi:10.1073/pnas.1012168108
- 1039 Vyazovskiy VV, Olcese U, Hanlon EC, Nir Y, Cirelli C, Tononi G. 2011. Local sleep in awake  
1040 rats. *Nature* **472**:443–447. doi:10.1038/nature10009
- 1041 Warnaby CE, Sleigh JW, Hight D, Jbabdi S, Tracey I. 2017. Investigation of Slow-wave Activity  
1042 Saturation during Surgical Anesthesia Reveals a Signature of Neural Inertia in Humans.  
1043 *Anesthesiology* **127**:645–657. doi:10.1097/ALN.0000000000001759
- 1044 Witten IH, Frank E, Hall MA. 2011. Data mining: practical machine learning tools and  
1045 techniques, 3rd ed. ed, Morgan Kaufmann series in data management systems.  
1046 Burlington, MA: Morgan Kaufmann.
- 1047 Yu S, Huang D, Singer W, Nikolic D. 2008. A small world of neuronal synchrony. *Cereb Cortex*  
1048 **18**:2891–2901. doi:10.1093/cercor/bhn047
- 1049 Zhang Z, Ferretti V, Güntan İ, Moro A, Steinberg EA, Ye Z, Zecharia AY, Yu X, Vyssotski AL,  
1050 Brickley SG, Yustos R, Pillidge ZE, Harding EC, Wisden W, Franks NP. 2015. Neuronal  
1051 ensembles sufficient for recovery sleep and the sedative actions of  $\alpha 2$  adrenergic  
1052 agonists. *Nat Neurosci* **18**:553–561. doi:10.1038/nn.3957
- 1053 Zhou W, Cheung K, Kyu S, Wang L, Guan Z, Kurien PA, Bickler PE, Jan LY. 2018. Activation of  
1054 orexin system facilitates anesthesia emergence and pain control. *Proc Natl Acad Sci*  
1055 *USA* **115**:E10740–E10747. doi:10.1073/pnas.1808622115
- 1056 Zilles K, Palomero-Gallagher N. 2017. Multiple Transmitter Receptors in Regions and Layers of  
1057 the Human Cerebral Cortex. *Front Neuroanat* **11**:78. doi:10.3389/fnana.2017.00078  
1058
